1 **WORKING TITLE:** A Novel Denitrification Regulator, Adr, Mediates Denitrification Under  
2 Aerobic Conditions in *Sinorhizobium meliloti*.

3 **RUNNING TITLE:** Aerobic Denitrification in *Sinorhizobium meliloti*.

4 COREEN M. SLAPE<sup>a</sup>, ARATI V. PATANKAR<sup>a,b</sup>, AND JUAN E. GONZÁLEZ<sup>a,#</sup>

5 <sup>a</sup>Department of Biological Sciences, University of Texas at Dallas, Richardson, TX 75080.

6 <sup>#</sup>jgonzal@utdallas.edu

7

8

9

10

11

12

13

14

15

16

17

18

19

20

21

22 <sup>b</sup> Present address: Infectious Diseases Section, Veterans Affairs Palo Alto Health Care System,  
23 Palo Alto, CA, 94304.

24

## Abstract

25

26

27

28

29

30

31

32

33

34

35

36

37

38

39

40

## Importance

41

42

43

44

45

46

*Sinorhizobium meliloti* is a soil dwelling bacteria capable of forming a symbiotic relationship with several legume hosts. Once symbiosis is established, *S. meliloti* fixes atmospheric nitrogen into nitrogenated compounds, thus carrying out an important step in the nitrogen cycle. *S. meliloti* is also capable of the reverse process, denitrification, the reduction of nitrate and nitrite to nitrogen gas. In this study we have identified a novel regulator of denitrification in *S. meliloti*, Adr, which affects the expression of the denitrification genes in aerobically grown cultures. Analysis of the Adr sequence reveals a LuxR-like quorum sensing regulator, however, it does not respond to the known quorum sensing signals produced by *S. meliloti*. Additionally, we show that FixJ, the major regulator of denitrification and microaerobic respiration in *S. meliloti*, is active under our growth conditions. Comparison of the FixJ microarray to our Adr microarray shows a significant overlap between the two regulons. We also show that while Adr is not necessary for symbiotic nitrogen fixation, a functional copy of this regulator confers a competitive advantage to *S. meliloti* during host invasion. Our findings suggest that Adr is a new type of denitrification regulator and that it acts at the same regulatory level as FixJ.

Rhizobia contribute to the nitrogen cycle by fixing atmospheric nitrogen to nitrogenated compounds and by denitrification, the reduction nitrate and nitrite to nitrogen gas. Denitrification enhances the survival of *Sinorhizobium meliloti* in the various environments it may encounter, such as free-living conditions in the rhizosphere, during invasion of the plant host, and after a symbiotic relationship has been established. Oxygen concentration is the typical signal for denitrification gene expression. Recent studies of low oxygen cultures of *S. meliloti* have

47 outlined the regulation structure for denitrification. In this study, we examine the regulation of  
48 denitrification in aerobically grown *S. meliloti* cultures. Understanding how *S. meliloti* responds  
49 to various oxygen concentrations will result in a more complete picture of denitrification  
50 regulation in this agriculturally important organism and the impact of denitrification on the soil  
51 microbiome as a whole.  
52

53  
54  
55  
56  
57  
58  
59  
60  
61  
62  
63  
64  
65  
66  
67  
68  
69  
70  
71  
72  
73  
74  
75

## Introduction

*Sinorhizobium meliloti* is an aerobic soil dwelling  $\alpha$ -proteobacteria that is found in a variety of environments in which oxygen concentrations fluctuate, including free-living in the soil or in association with a plant host. Like many *Rhizobiaceae*, *S. meliloti* contributes to the nitrogen cycle, either by fixing atmospheric nitrogen as bacteroids in conjunction with a legume host (*Medicago sativa*) or by breaking down nitrates and nitrites to nitric oxide, nitrous oxide, or dinitrogen gas (Figure 1) (1). Although these two processes seem incongruous, both play an important role in *S. meliloti* (2, 3). During symbiosis with a legume host, oxygen limitation is intrinsic to the nodule and is required for the expression and function of the nitrogenase enzyme. The first step of denitrification, the reduction of nitrate to nitrite, removes any excess reducing power that may be present in the cell (4). Further steps remove nitrite from the nodule, ensuring the optimal environment for nitrogenase function. Aside from the presence of  $\text{NO}_x$  ( $\text{NO}_3^-$ ,  $\text{NO}_2^-$ , NO, or  $\text{N}_2\text{O}$ ), the major signal for the expression of the denitrification pathway is oxygen limitation. Denitrification usually occurs under anaerobic or low oxygen tension conditions where oxygen cannot serve as an efficient electron acceptor. However, it is now well established that denitrification can occur aerobically, either with no or partial oxygen limitation, in several bacteria, including *Paracoccus denitrificans*, *Pseudomonas aeruginosa*, and *Agrobacterium sp.* (5). While denitrification is documented in *S. meliloti*, most reports focus on microaerobic conditions such as those found in the nodule (6, 7). The primary role of aerobic denitrification is likely the removal of excess reducing power or detoxification of  $\text{NO}_x$  found in the environment (5). Since respiratory reduction of  $\text{NO}_x$  is coupled with energy generation, denitrification even in the presence of oxygen can enhance bacterial survival in environments where the oxygen concentration may fluctuate (5).

76 Denitrification may also allow *S. meliloti* to remove nitrate or nitrite from the soil near  
77 plant roots as these compounds inhibit bacterial attachment to host roots (8). While migrating  
78 through the infection thread during root invasion, the ability of *S. meliloti* to denitrify enhances  
79 its survival when it encounters plant defense responses such as nitric oxide bursts (9). Once *S.*  
80 *meliloti* successfully inhabits the nodules, denitrification is thought to be active to reduce nitrate,  
81 as it is inhibitory to nitrogenase activity (10).

82 An overview of the regulation of denitrification and nitrogen fixation in *S. meliloti* is  
83 shown in Figure 8. The FixL/FixJ two component system is essential for *S. meliloti* to form a  
84 symbiotic relationship with a legume host (11). FixL is a membrane bound sensory kinase that  
85 detects oxygen levels in the environment. When the oxygen concentration in the environment  
86 drops, FixL autophosphorylates and transfers the phosphate to FixJ (12). Previous studies have  
87 demonstrated that phosphorylation of FixJ relieves the weak interaction of the FixJ DNA binding  
88 domain (C-terminal) and the signal recognition domain (N-terminal) by triggering a  
89 conformational change (13). Once this interaction between domains is abolished, FixJ is able to  
90 bind DNA and/or dimerize (14). The FixJ C-terminal domain alone is able to recognize  
91 promoters and activate transcription in the absence of phosphorylation, which supports the  
92 theory that the N-terminal signal recognition domain is regulatory in nature (15). Though  
93 dimerization is not essential for DNA binding or promoter recognition, it is thought to contribute  
94 to promoter binding affinity (14).

95 Two component systems similar to FixL/FixJ are fairly ubiquitous in nitrogen fixing  
96 bacteria. However, regulation downstream of FixJ can vary greatly (16). In *S. meliloti* FixJ has  
97 five direct targets: *nifA*, *fixK1*, *fixK2*, *proB2*, and *SMc03253* (17, 18). *NifA* is located on the  
98 symbiotic plasmid, pSymA, and is essential for nitrogen fixation. It is an enhancer-binding

99 protein that acts in conjunction with  $\sigma^{54}$  to control the expression of nitrogenase (*nifH*, *nifDK*)  
100 and a high oxygen affinity cytochrome oxidase (*fixABCX*) (11). Two copies of FixK are also  
101 found on pSymA and are classified as *crp/fnr*-type regulators that control the expression of the  
102 denitrification genes (*nap*, *nir*, *nor*, *nos*) as well genes responsible for the synthesis of an oxidase  
103 with high oxygen affinity (*fixNOPQ*) (19). It is unknown why chromosomally located *proB2* and  
104 *SMc03253*, both involved in proline metabolism, are direct targets of FixJ (17, 18).

105 Unlike many other FixL/FixJ systems found in rhizobia, FixJ does not directly  
106 autoregulate in *S. meliloti* (Figure 8). Instead, FixK controls the expression of *fixT*, an antikinase  
107 that represses the FixLJ regulon by preventing the autophosphorylation of FixL (20). Repression  
108 by FixT is abolished in the absence of the glutamine-dependent asparagine synthetase, *asnO*,  
109 though how this occurs is still poorly understood (21). One possibility suggests that AsnO may  
110 serve a regulatory role by monitoring nitrogen balance within the cell via a metabolite, such as  
111 glutamine, and controlling nitrogen fixation accordingly (21). However, more study is required  
112 to determine how the interaction works, though it is known that neither FixT nor AsnO is  
113 required for nitrogen fixation in *S. meliloti* (22).

114 In addition to acting as an oxygen sensor, FixL also detects nitric oxide. Meilhoc et al.  
115 demonstrated that FixLJ along with the nitric oxide response regulator (NnrR) are involved in the  
116 *S. meliloti* response to nitric oxide exposure (23). The nitric oxide response was observed when  
117 lag phase cultures were exposed to a nitric oxide donor under aerobic conditions, as well as  
118 inside the nodule.

119 During symbiosis, oxygen concentrations can be as low as 5-30 nM within legume  
120 nodules, compared to the aerobic conditions in culture media where oxygen concentrations are  
121 approximately 250  $\mu$ M at the start of growth (22, 24). Since most denitrification studies are

122 performed under low oxygen tension and/or early in culture growth, we found that there is  
123 limited literature regarding denitrification in *S. meliloti* under conditions such as the higher cell  
124 population densities, which occur in the rhizosphere prior to root invasion. Previous unpublished  
125 work performed in our laboratory has revealed that a LuxR-like regulator, SMc00658, is  
126 involved in the regulation of denitrification at high cell population densities in aerobically grown  
127 cultures (Patankar AV and González JE, unpublished data). For this reason, we have changed the  
128 name of the *SMc00658* locus to the aerobic denitrification regulator, *adr*. Unlike traditional  
129 LuxR-like response regulators, Adr does not respond to the *N*-acylhomoserine lactone (AHL)  
130 molecules produced by *S. meliloti* (25). It also does not appear to be regulated by the legume  
131 symbiosis quorum sensing regulator ExpR. In the absence of Adr, we see a dramatic drop in the  
132 expression of *fixK*, *nifA*, and the downstream genes (*nap*, *nir*, *nor*, *nos*) which is remarkably  
133 similar to the expression profile of a *fixJ* mutant (17). This change in expression is independent  
134 of the presence or absence of *S. meliloti* AHLs (Patankar AV and González JE, unpublished  
135 data).

136 In this study, we show that the FixLJ system is actively expressed under aerobic growth  
137 conditions and that Adr is necessary for this activity. We also demonstrate that while Adr has a  
138 dramatic effect on the expression of FixK and NifA under aerobic conditions, it is not required  
139 for nitrogen fixation in the nodule.

## 140 **Results**

141 **Adr sequence analysis.** Initial sequence analysis suggests that Adr belongs to the LuxR  
142 family of transcriptional regulators. These regulators are identified by a carboxyl-terminal helix-  
143 turn-helix motif and an amino-terminal signal recognition domain. LuxR family regulators are  
144 best known for their role in quorum sensing, where they act as the signal response regulator.

145 However, the LuxR family is large and loosely conserved, with a reported 18-25% overall  
146 sequence identity (26). *S. meliloti* has several characterized LuxR-like regulators, including the  
147 quorum sensing regulators ExpR and SinR, the motility regulators VisN and VisR, and the  
148 methyl cycle regulator NesR (27-29). Here we report a new LuxR-like transcriptional regulator  
149 in *S. meliloti*, Adr, which appears to regulate aerobic denitrification.

150         Though members of the LuxR family generally have very low sequence identity, 95% of  
151 known LuxR family members share nine conserved residues that are important for DNA binding  
152 and AHL signal recognition (Figure 2) (30). Sequence analysis shows that Adr only has four of  
153 these nine conserved residues, three of the DNA binding residues and only one of the signal  
154 recognition residues. Based on this analysis, it is unlikely that Adr responds to AHL signals.  
155 Additionally, when *S. meliloti* is unable to produce AHLs, there is no effect on the expression or  
156 function of Adr when compared to AHL producing cultures (Patankar AV and González JE,  
157 unpublished data).

158         Among functionally characterized LuxR-like regulators reported to date, AvhR (a  
159 regulator from *Agrobacterium vitis* responsible for plant necrosis) shows the most sequence  
160 homology to Adr (28%). Consequently, this regulator also lacks the typically conserved AHL  
161 binding residues found in other classical quorum sensing LuxR type regulators (31).

162         **Disruption of *adr* reduces expression of denitrification and nitrogen fixation genes.**

163 To determine the regulatory role of Adr during normal growth of *S. meliloti*, we conducted a  
164 microarray analysis to compare the transcriptomic profiles of wild-type *S. meliloti* Rm8530 to  
165 Rm8530 *adr*. Since Adr is similar to quorum sensing related regulators, conditions for the  
166 microarray followed those used for other quorum sensing expression analysis microarrays (27,  
167 32). Cultures were aerated and grown to early stationary phase (OD<sub>600</sub> 1.2) before RNA was



168 harvested. Preliminary analysis performed using the AffyMetrix GCOS software revealed that  
169 427 genes were differentially regulated between the wild-type and the *adr* mutant (Supplemental  
170 Table S1). Of these, 247 genes were downregulated in the *adr* mutant. Within this set of  
171 downregulated genes, we were particularly interested in the genes involved in denitrification  
172 (*nap*, *nir*, *nor*, *nos*) and microaerobic respiration (*fix*) (Table 4). Further analysis of the  
173 microarray data revealed that the regulatory genes *fixK1*, *fixK2*, and *nifA* were also  
174 downregulated in the absence of Adr. Previous work on the denitrification pathway performed by  
175 Bobik et al. revealed that FixJ is the major regulator of limited oxygen response in *S. meliloti*.  
176 This response includes activating the denitrification pathway. When comparing our microarray  
177 results to those obtained by Bobik et al. we observed an 83% overlap of genes regulated by FixJ  
178 and Adr, indicating that Adr is a yet uncharacterized regulator involved in the denitrification and  
179 limited oxygen response pathways in *S. meliloti* (Table 4) (17).

180 To verify our microarray results, several genes involved in the denitrification pathway  
181 were selected for quantitative real time-PCR analysis (Figure 3). Results are represented as fold  
182 change, which is  $2^{\Delta Ct}$ , where  $\Delta Ct$  equals the difference in expression of the wild-type from the  
183 mutant. *napA*, *nirK*, *norC*, and *nosZ* are structural subunits of nitrate reductase, nitrite reductase,  
184 nitric oxide reductase, and nitrous oxide reductase, respectively. Genes were selected based on  
185 M-value (>1.5). The results of this analysis indicate a significant downregulation (5- to 300-fold  
186 change) in each step of the denitrification pathway in the absence of Adr (Figure 3a). We also  
187 included *fixK* and *nifA* in this analysis since these two regulators also appeared in our microarray  
188 data. The reduction of *fixK* (16-fold) and *nifA* (42-fold) expression seen in Figure 3a in the *adr*  
189 mutant is typically seen in a *fixJ* mutant, indicating that Adr impacts these genes even in the

190 presence of FixJ. The decrease of FixK is likely causing the downstream effect in the  
191 denitrification genes.

192 We next measured the effect of Adr on other FixK dependent genes, including the two  
193 subunits of high oxygen affinity cytochrome oxidases, *fixG* and *fixQ1* (Figure 3b) (33). As was  
194 the case with the denitrification pathway genes, the lack of Adr lead to a decrease in *fixG* and  
195 *fixQ1* expression (39-fold and 42-fold respectively), confirming that FixK is downstream of Adr  
196 when regulating genes related to the denitrification and limited oxygen response pathways.

197 We also measured *nifA* expression since, like FixK, it is controlled by FixJ. As was the  
198 case with *fixK*, the removal of Adr leads to a decrease in expression of *nifA* (Figure 3a).  
199 However, unlike with FixK, we found that genes downstream of NifA, such as *nifH* or *fixA*, were  
200 not affected by the presence or absence of Adr (Figure 3b). This is unsurprising since previous  
201 studies have shown NifA to be sensitive to oxygen levels higher than those found in the nodule;  
202 though the *nifA* gene is being expressed, its translated form is not active under our aerobic  
203 growth conditions (3).

204 Though not seen in our microarray data, we also tested the effect of Adr on *nnrR*, the  
205 nitric oxide response regulator. This regulator induces the transcription of nitrite reductase  
206 (*nirKV*) and nitric oxide reductase (*norECBQD*) in the presence of nitric oxide. While FixLJ also  
207 responds to nitric oxide, NnrR is not in the FixJ regulon (23). Under our conditions, we saw no  
208 differential expression of *nnrR* (data not shown).

209 Since the expression of both *nifA* and *fixK* are impacted by the absence of Adr, it appears  
210 that Adr is acting in a manner that is either parallel and/or in conjunction with FixJ.

211 **Adr and FixJ regulate denitrification in tandem.** Previous studies of *S. meliloti*  
212 denitrification have revealed FixJ as the major denitrification regulator (Figure 8) (17, 34). These

213 studies approached denitrification regulation by examining expression under microoxic (<2%  
214 oxygen) conditions, comparable to those found before the cells enter the nodule as well as after  
215 the cells differentiate into nitrogen fixing bacteroids. In our study, we show that many of the  
216 same genes regulated by FixJ also show differential expression in the absence of Adr in  
217 aerobically grown cells. Though not a direct comparison due to the difference in conditions, we  
218 found that 83% of genes reported by Bobik, et al. to be regulated by FixLJ are also differentially  
219 expressed in the Adr mutant (17). Additionally, it was also noted that the five genes directly  
220 regulated by FixJ (*fixK1*, *fixK2*, *nifA*, *proB2*, and *SMc03253*) were also found to be regulated by  
221 Adr (Table 4) (18).

222 In light of these findings, we generated a *fixJ* mutant to determine if the FixLJ system is  
223 active under the same conditions as Adr. qRT-PCR analysis of the *fixJ* mutant revealed that the  
224 FixJ is actively influencing denitrification expression in aerated stationary phase cultures (Figure  
225 4a). Direct targets of FixJ such as *fixK* and *nifA* were downregulated (approximately 1000-fold)  
226 in the *fixJ* mutant; downregulation was also seen in the indirect targets including the  
227 denitrification (100- to 1000-fold) and microoxic respiration genes (65- to 70-fold) (Figure 4b  
228 and 4c). However, as with the *adr* mutant, we did not see a large change in expression of genes  
229 controlled by NifA (a direct target of FixJ) such as the nitrogenase structural gene *nifH* or a  
230 subunit of another oxidase, *fixA* (Figure 4c). This supports data from other laboratories that  
231 found that nitrogenase and its auxiliary proteins are only expressed in bacteroids (3).

232 The presence of an active FixJ revealed the possibility that *adr* is either regulated by the  
233 FixLJ system or regulated independently but affecting the same genes. To this end, we measured  
234 the expression of *adr* in the absence and presence of *fixJ*. We also tested the reverse to determine

235 if *fixJ* expression depends on the presence of *adr*. In both cases we saw no differential expression  
236 between the wild-type and mutant backgrounds (data not shown).

237 A *fixJ adr* double mutant was also constructed to determine if there is an additive effect  
238 on expression by Adr and FixJ. Expression levels of *fixK*, *napA*, *nirK*, *norC*, and *nosZ* were  
239 compared between the *adr*, *fixJ*, and *fixJ adr* double mutant. Results show that there is no  
240 compounding effect by introducing an *adr* mutation into a *fixJ* mutant (Figure 4a).

241 To verify that Adr is working at the FixJ level, we measured the expression of the  
242 denitrification genes in a *fixK* double mutant. The results confirm that when FixK is not  
243 expressed, which we suspect occurs in an *adr* mutant, the denitrification genes are not expressed  
244 (Figure 4a).

245 **Expression of *adr* during growth.** Past studies have focused on the activity of FixJ and  
246 as a consequence experiments were performed under conditions that lead to FixLJ activation.  
247 Therefore, previous work was generally done early in the growth cycle (OD<sub>600</sub> 0.2-0.5) and  
248 under microoxic (2% O<sub>2</sub>) conditions. To determine if growth phase had an effect on Adr  
249 expression, we performed additional expression measurements during lag (OD<sub>600</sub> 0.2) and mid  
250 exponential (OD<sub>600</sub> 0.8) growth which was compared to our stationary phase data (OD<sub>600</sub> 1.2).  
251 Results show that there is very little change in expression of the *napA*, *nirK*, *norC*, and *nosZ*  
252 genes during lag growth when wild-type was compared to the *adr* mutant. However, activation  
253 of denitrification gene expression occurs during mid exponential phase and continues into  
254 stationary phase (Figure 5). We also analyzed the expression of *adr* over time and found that  
255 there is no difference in expression of the gene in wild-type Rm8530 between the three time  
256 points tested (Table 5).

257            Since differential expression due to Adr was detected during exponential growth, we next  
258 attempted to determine if a media soluble signal was responsible for this change. Spent media  
259 was harvested from early stationary phase cultures and used to grow fresh cultures of Rm8530  
260 and Rm8530 *adr* to OD<sub>600</sub> 0.2. While no difference in expression was seen between cultures  
261 using fresh versus spent media, we do not rule out the possibility of a signal produced by the cell  
262 involved in the activation of Adr (data not shown).

263            **Effect of the absence of FixL.** As discussed previously, FixL is the oxygen sensing  
264 component of the FixLJ system. Our data presented here shows that there is a relationship  
265 between Adr and FixJ under aerobic conditions. To determine if FixL has a role in this  
266 relationship by interacting with Adr, a *fixL* mutant was generated and expression of *adr* was  
267 measured. Expression of *adr* was not affected by the absence of FixL in stationary phase (data  
268 not shown).

269            **The Adr mutant shows decreased survival under oxygen limitation in the presence**  
270 **of nitrite.** Since Adr enhances expression of the denitrification pathway under aerobic  
271 conditions, we measured the effect of Adr during aerobic growth. Rm8530 (wild-type) and  
272 Rm8530 *adr* were grown in TYC media supplemented with either 10 mM KNO<sub>3</sub>, or 5 mM  
273 NaNO<sub>2</sub> was. The growth rate was similar between all strains under all three conditions (Figure  
274 6a). Viable counts were performed on aerobically grown cultures after 72 hours to determine  
275 survival of *S. meliloti* under conditions listed above. No difference in survival was observed  
276 (Figure 6b).

277            Since no difference in growth or survival was observed during aerobic growth conditions,  
278 we also conducted the same growth and survival assay under microaerobic conditions. Cultures  
279 were grown in LB/MC for two days then diluted to OD<sub>600</sub> 0.2 in TYC before microaerobiosis

280 was induced by filling the headspace of the vial with a mixture of 2% oxygen and 98% argon  
281 gas. Figure 6c shows that, while growth appeared to be similar between the wild-type and mutant  
282 under all three conditions, the number of viable colony forming units dropped significantly when  
283 the *adr* mutant was grown in media containing nitrite (Figure 6d). Anaerobic conditions were  
284 also tested but no growth or denitrification was seen after seven days of incubation (data not  
285 shown).

286 **The nitrate reductase activity in *S. meliloti*.** The *S. meliloti* nitrate reductase is encoded  
287 by the *nap* genes, which are controlled by FixJ, though expression of these genes in *S. meliloti*  
288 was thought to be constitutive regardless of oxygen concentration (2, 35). The microarray data  
289 and qRT-PCR analysis presented here indicate otherwise. We have shown that the *nap* genes are  
290 expressed by wild-type *S. meliloti* during aerobic growth, but that the expression is controlled by  
291 both FixJ (through FixK) and Adr (Figure 4a). Previous studies have demonstrated that under  
292 microaerobic conditions, the *S. meliloti* strain Rm2011, a strain very similar to Rm8530, has an  
293 active nitrate reductase and can convert nitrate to nitrite during growth (36). To determine if the  
294 transcripts of the *nap* genes are being translated into a functional enzyme in our strains, we  
295 performed assays using methyl viologen to determine the Rm8530 and Rm8530 *adr* nitrate  
296 reductase activities. Cells grown aerobically or microaerobically in nitrate free minimal media  
297 were tested. In both the aerobically grown wild-type and *adr* mutant samples, no change in  
298 absorbance was observed after adding 10 mM of KNO<sub>3</sub>, indicating that the conditions tested,  
299 these strains do not produce detectable levels of nitrate reductase. The same results were seen in  
300 cells grown in 2% oxygen (data not shown). However, when the cells were grown for 72 hours  
301 such as in Figure 6, low amounts of nitrite were detected qualitatively (via nitrite detection

302 strips) in cultures of both Rm8530 and the *adr* mutant grown in 10 mM KNO<sub>3</sub>, indicating that  
303 there is a low level of nitrate reductase activity.

304 **The *Adr* mutant has reduced nitrite reductase activity.** *S. meliloti* encodes a copper-  
305 containing nitrite reductase, *nirK*, whose enzyme product is found in the periplasm (35, 37). As it  
306 appears that *S. meliloti* is incapable of utilizing nitrate for the first step of denitrification, we next  
307 tested whether nitrite could be used to initiate the reaction. Under microaerobic conditions, wild-  
308 type Rm8530 showed a growth and survival deficiency (Figure 6c and 6d). However, this growth  
309 defect was not as dramatic as that seen in the *adr* mutant. This led us to believe that Rm8530 is  
310 capable of using nitrite to initiate denitrification, and that the inability to do so prevents the  
311 mutant from removing this toxic compound from the environment, resulting in slower growth  
312 and poor survival. To test the nitrite reductase activity, we performed the same methyl viologen  
313 assay as described above, using 10 mM sodium nitrite as the substrate. We found the nitrite  
314 reductase activity of wild-type cells to be ten times higher than that of the *adr* mutant when the  
315 cells were grown aerobically (Table 6). This observation matches our qRT-PCR data in that the  
316 expression of *nirK* is reduced in the *Adr* mutant when grown under aerobic conditions, but not as  
317 reduced as the expression levels of *nirK* in the *FixJ* mutant (Figure 4).

318 Microaerobically grown wild-type cells also exhibited higher nitrite reductase activity  
319 than the *adr* mutant, though the mutant was still capable of reducing nitrite (Table 7). We also  
320 observed that under microoxic conditions, cells lacking *adr* can express nitrite reductase at a  
321 level comparable to wild-type under aerobic conditions (Table 6). We predict that this change in  
322 expression of nitrite reductase from aerobic growth to microaerobic growth is due to the  
323 activation of the *FixLJ* system under microoxic conditions. However, it appears that for optimal

324 denitrification under these conditions using nitrite as the substrate, both FixJ and Adr are  
325 necessary.

326 **Absence of Adr results in a decrease in competitiveness during *Medicago sativa***  
327  **symbiosis.** Successful symbiosis and nitrogen fixation requires *S. meliloti* to not only perform  
328 the appropriate symbiotic functions at the right time, but it must also compete against other  
329 organisms in the rhizosphere for resources and hosts. To determine the symbiotic and  
330 competitive characteristics of an *adr* mutant, plant nodulation assays were performed. *Medicago*  
331 *sativa* inoculated with either Rm8530 or Rm8530 *adr* were equally proficient at forming  
332 nitrogen fixing nodules (Figure 7a). Since it has been shown that FixJ is a regulator of symbiosis,  
333 we also included a *fixJ* mutant and the *fixJ adr* double mutant in the nodulation assay to ensure  
334 that any effect that Adr has on nodulation was not obscured by an active FixJ. However, as  
335 shown in Figure 7a, there is no significant difference between plants inoculated with Rm8530  
336 *fixJ* and those inoculated with the double mutant. Both sets of plants exhibited the classic Fix<sup>-</sup>  
337 phenotype of poor growth and a severe decrease in the number of nitrogen fixing nodules, which  
338 is typical of FixJ mutants.

339 While there appears to be no difference between wild-type Rm8530 and Rm8530 *adr*  
340 invasion efficiency in monoculture, we also assessed the ability of these strains to compete for  
341 invasion when co-inoculated. Wild-type Rm8530 and the *adr* mutant were mixed in a range of  
342 ratios (100:1, 10:1, 1:1, 1:10, and 1:100) and applied to plants. After harvesting bacteria from the  
343 root nodules, we found that that Rm8530 was able to out-compete the *adr* mutant during  
344 nodulation (Figure 7b). This indicates that while Adr is not essential for nitrogen fixing nodules  
345 to form, it is beneficial to *S. meliloti* during growth in the rhizosphere.



346

## Discussion

347

348

349

350

351

352

353

354

355

356

357

358

359

360

361

362

363

364

365

366

367

368

Understanding the process of denitrification and its regulation is an ongoing task. While the machinery of denitrification and nitrogen fixation have been known for some time, determining how these pieces fit together under a complex regulatory web has proved to be a challenging undertaking. Though most denitrification regulatory elements are very similar, such as a sensory two-component system and *crp/fnr*-type regulators, interactions between these components vary between denitrifiers (2). Members of the same regulatory family perform different roles in various genetic backgrounds and target different respiratory systems while regulating denitrification (2). For example, in *S. meliloti* and *Bradyrhizobium japonicum*, FixL senses low oxygen tension and activates a regulatory cascade through FixJ that leads to the expression of the denitrification and nitrogen fixation pathways (38). Additionally, both *S. meliloti* and *B. japonicum* possess duplicated copies of the *fixK* gene, a *crp/fnr*-type regulator. However, in *S. meliloti* both copies of *fixK* activate the same set of promoters, while in *B. japonicum* FixK<sub>2</sub> is essential for denitrification and nitrogen fixation, as well as regulating the expression of FixK<sub>1</sub> (16). In *Pseudomonas* species, a variant of FixLJ, the NarXL system, controls denitrification and NarL acts as the transcriptional activator of the nitrate reductase genes (39, 40).

Unlike the typical model denitrifiers, genes for the denitrification pathway in *S. meliloti* are located on the symbiotic plasmid pSymA instead of the chromosome (2, 33). Generally, rhizobia are considered to have acquired nitrogen fixing capabilities (*fix* and *nif* genes) by horizontal gene transfer of the symbiotic plasmid (35). It is reasonable to assume that the same is true for the denitrification genes as they are interspersed among the *fix* genes on pSymA and both the symbiotic nitrogen fixation genes and the denitrification genes share the same regulator

369 (FixJ). The origin of the denitrification genes may also explain the differences in denitrification  
370 efficiency observed between various strains of *S. meliloti*. For example, in a study of 13 *S.*  
371 *meliloti* strains, three failed to denitrify when nitrate was used as a terminal electron acceptor  
372 under anaerobic conditions, despite the presence of the appropriate reductases (1). However,  
373 when some amount of oxygen was present, all strains tested were able to reduce nitrate to either  
374 nitrous oxide or dinitrogen gas (1).

375 In most bacteria the regulators of the denitrifying pathway (*fixK*, *nosR*, *nnr*) lie in close  
376 proximity to the genes that code for the reductase enzymes; this is also true of *S. meliloti*, these  
377 regulators are found on the symbiotic plasmid pSymA (33). Other denitrification regulators that  
378 have been observed are typically global transcriptional activators found outside the  
379 denitrification loci (2). In this study we analyze Adr, a LuxR-like protein located on the  
380 chromosome of *S. meliloti*. LuxR family proteins affect a broad number of cell functions that  
381 typically act on multiple operons; both FixJ and NarL belong to this superfamily due to the helix-  
382 turn-helix homology they share. Adr also appears to play a role in the expression of many cell  
383 functions including denitrification, ornithine catabolism (*arc*), sugar metabolism (*smo*), motility,  
384 and genes that appear to be involved in respiration (*pnt* and *cyo*) (Supplemental Table S1).

385 As Adr is a predicted quorum sensing regulator, we examined whether population size or  
386 AHLs play a role in how this regulator functions. We observed that the presence or absence of  
387 the native AHLs synthesized by *S. meliloti* had no effect on the expression of the denitrification  
388 genes. Upon further analysis of the Adr sequence, we found that though this regulator contains a  
389 LuxR-like AHL binding domain, key residues for AHL binding are absent. This makes it  
390 unlikely that Adr is a traditional AHL-dependent LuxR-like quorum sensing regulator. However,  
391 when we examined the expression of the denitrification genes at different growth phases in the

392 presence and absence of Adr, we found that Adr begins to affect expression in between early  
393 growth (OD<sub>600</sub> 0.2) and mid-exponential growth (OD<sub>600</sub> 0.8). This allows for the possibility that  
394 Adr is responding to an environmental or secreted signal that is not traditionally associated with  
395 quorum sensing, such as environmental oxygen concentration. In an attempt to induce expression  
396 during early growth, we grew cells in spent media that should contain the putative signal  
397 molecule, but we were unable to detect any difference in expression between cells grown in fresh  
398 media and spent media. However, we do not rule out the possibility of a cell produced molecule  
399 triggering the expression of denitrification genes by Adr.

400         Various factors such as nitrate concentration, oxygen concentration, metal ion  
401 availability, and moisture influence denitrification in the laboratory as well as the external  
402 environment (2). Denitrification can occur under a range of oxygen concentrations and is no  
403 longer considered a strictly anaerobic process. In this study we examined how oxygen influences  
404 the expression of the denitrification system in *S. meliloti*. In our genome wide transcriptomic  
405 study, we compared the *adr* mutant to wild-type Rm8530. We found that the denitrification  
406 pathway is expressed in aerobically grown wild-type cells during stationary phase, but  
407 expression is decreased in the absence of *adr*. Previously, Bobik et al. showed that FixJ is the  
408 major regulator of denitrification and low oxygen response in *S. meliloti*. When our data is  
409 compared side by side with that obtained by Bobik et al., there is a remarkable overlap between  
410 the results (17). With this in mind, we examined the relationship between Adr and FixJ. Under  
411 our conditions we did not expect the low oxygen dependent regulator of denitrification, FixJ, to  
412 be active. However, we observed that when FixJ was removed, the expression of the  
413 denitrification genes was reduced 100- to 1000-fold when compared to wild-type levels of  
414 transcription. There are several possible explanations for this 1) the oxygen content of our

415 aerobic cultures was low enough to activate FixJ via FixL, 2) unphosphorylated FixJ is sufficient  
416 to induce transcription of the denitrification genes, or 3) an unknown factor allows for enhanced  
417 aerobic activity of FixJ. Considering the high degree of similarity between the Adr data and the  
418 expression data gathered by Bobik, *et al* on FixJ, we consider the third option to be most likely,  
419 with the unknown facilitating factor being identified here as Adr. We do acknowledge that  
420 oxygen concentrations in stationary phase media are decreased when compared to fresh media.  
421 However, it is clear that FixJ and Adr each have an effect on denitrification expression without  
422 intentional oxygen removal. Further research is required to determine the mechanism by which  
423 the above observed phenomena occur.

424         Due to the tiered expression control of the denitrification genes, we also included FixK in  
425 our study. Under aerobic growth conditions, the presence of both FixJ and Adr, acting through  
426 FixK, are required for the optimal expression of the denitrification genes (*nap*, *nir*, *nor*, *nos*) in *S.*  
427 *meliloti*. While the absence of Adr decreases the expression of these genes 5- to 300-fold,  
428 removing FixJ has a larger effect on expression. This indicates that the effect of Adr on  
429 denitrification is indirect; as proposed above, Adr likely acts to facilitate FixJ-dependent  
430 expression when oxygen is present. Since neither FixJ nor Adr affect the other's transcription,  
431 we suspect that a protein-protein interaction may be occurring. Whether Adr functions to  
432 stabilize FixJ under free-living oxygenated conditions or help FixJ bind to the DNA is unknown  
433 at this time. Further study is required to elucidate the potential interaction occurring between  
434 these two proteins.

435         In addition to transcriptomic studies, we also assessed the ability of Rm8530 and the  
436 Rm8530 *adr* mutant to denitrify in a variety of conditions, including different oxygen  
437 concentrations and in the presence and absence of nitrate and nitrite. Nitrate represents one of the

438 fixed forms of nitrogen in the environment and an essential component in the biosphere, serving  
439 as a nutrient for plants and microorganisms and acting as a final electron acceptor in several  
440 bacteria, archaea, and eukaryotes (41). This heavily sought after resource is utilized by microbes  
441 involved in performing reactions that contribute to the nitrogen cycle, such as denitrification and  
442 dissimilatory nitrate reduction (42). The reduction of nitrate to nitrite is a key reaction in the  
443 nitrogen cycle and is the first step of denitrification. Nitrite is found in water and soil  
444 environments as a result of the first step of denitrification and as an intermediate of microbial  
445 nitrification (43).

446 Under anaerobic conditions, no growth and no evidence of denitrification was observed  
447 in either strain of *S. meliloti*, even after seven days of incubation. Since *S. meliloti* is an aerobe,  
448 we surmise that it is not capable of transitioning from respiration to denitrification when there is  
449 a complete lack of oxygen. It has also been suggested that most rhizobial denitrification is energy  
450 inefficient, since they are observed to grow slowly in comparison to other denitrifiers (44). This  
451 observation serves to emphasize the variation in denitrification ability seen between strains of *S.*  
452 *meliloti*. In the previously mentioned study of thirteen *S. meliloti* strains, ten strains were capable  
453 of anaerobic growth using nitrate as a terminal electron acceptor (1).

454 Under aerobic conditions we observed limited denitrification by qualitatively monitoring  
455 nitrite levels in the media using nitrite test strips; cells grew normally in both nitrate and nitrite  
456 with no survival defects (Figure 6a and 6b), though the *adr* mutant was not as efficient at  
457 reducing nitrate and nitrite as the wild-type strain. When cells were grown under microaerobic  
458 conditions, a decrease in growth and survival in relation to the aerobic cultures was observed  
459 (Figure 6). This growth defect may be explained in several ways. When growing aerobically, *S.*  
460 *meliloti* does not have to rely on denitrification for energy generation. While the process is

461 occurring, it is simply not necessary for the production of proton motive force and ATP because  
462 the electrons will pass to oxygen instead of a NO<sub>x</sub>. Once the oxygen concentration in the  
463 environment drops, the cells require high oxygen affinity cytochrome oxidases and NO<sub>x</sub>  
464 reductases in order to maintain energy production. Therefore, it is possible that this decrease in  
465 growth is due to the lower amount of energy that *S. meliloti* is able to produce under limited  
466 oxygen conditions (45).

467 While nitrite is known to be toxic to *S. meliloti*, we saw no evidence of this during  
468 aerobic growth. When the cells were grown microaerobically in the same concentration of nitrite,  
469 growth and survival were both reduced (Figure 6c and 6d). In the *adr* mutant, it is reasonable to  
470 assume that this reduction in survival is due to the impaired ability of the strain to reduce nitrite,  
471 leading to lower energy production and longer exposure to the nitrite. The wild-type strain also  
472 has reduced survivability which may be attributable to the closed environment of the growth vial  
473 that would allow the accumulation nitric oxide (toxic to *S. meliloti*) before complete reduction to  
474 nitrogen gas can occur.

475 We next explored whether the *nap* and *nir* translation products are functional in *S.*  
476 *meliloti*. Both the nitrate (*nap*) and nitrite (*nir*) reductases in *S. meliloti* are localized in the  
477 periplasm. *S. meliloti* only possesses the periplasmic *nap* variant of nitrate reductase; the  
478 respiratory nitrate reductase is not present in the genome. Typically, periplasmic nitrate  
479 reductases are expressed aerobically in order to remove excess reducing power and provide  
480 nitrite for the next step of aerobic denitrification (46). Conversion of nitrite to nitric oxide can be  
481 carried out by two types of reductases: the cytochrome *cd<sub>1</sub>*-type reductase or the copper  
482 containing nitrite reductase. *S. meliloti* encodes *nirKV*, a copper containing periplasmic nitrite  
483 reductase and an accessory protein which is required for reductase activity (45). The function of

484 both the nitrate and nitrite reductases can be assayed with the addition of the artificial electron  
485 donor methyl viologen. When added to whole cells, methyl viologen can donate electrons to  
486 enzymes located in the periplasm, but cannot cross the bacterial membrane, allowing for a  
487 specific assay of reductases localized in the periplasm (37).

488         Since the nitrate and nitrite reductases are not oxygen sensitive, we assayed the reductase  
489 activities in aerobically grown cells as well as microaerobically grown cells. No denitrifying  
490 activity was seen when nitrate was used as a substrate in either growth conditions. This  
491 corroborates the results seen in our growth assays. If *S. meliloti* were capable of reducing nitrate  
492 to nitrite, we would expect to see the same microaerobic growth defect in cultures with nitrate as  
493 those results seen when nitrite was present (Figure 6d). These results lead to the conclusion that  
494 the denitrification pathway in Rm8530 is truncated and likely begins at the second step, the  
495 reduction of nitrite to nitric oxide. Many denitrifiers are capable of bypassing this low energy  
496 reduction of nitrate to nitrite since nitrite is present in the environment (43). For example, similar  
497 results were seen in a *napA* gene analysis in *Pseudomonas* isolates; several strains were positive  
498 for *nap* gene expression but were incapable of denitrification when nitrate was provided as a  
499 substrate (47).

500         When nitrite was provided as a substrate, we found nitrite reductase activity in both  
501 aerobic and microaerobic conditions in wild-type Rm8530. There is limited activity of the nitrite  
502 reductase in the *adr* strain under aerobic conditions, supporting our previous data showing a  
503 reduction in transcription of these genes in the mutant. Additionally, when the *adr* mutant was  
504 grown under microaerobic conditions, there was increased activity of the nitrite reductase  
505 compared to aerobic conditions, though levels were not restored to wild-type activity. This  
506 increase may be linked to the microaerobic environment. Previous studies have shown that under

507 low oxygen concentrations, FixJ is responsible for *nirK* expression (48). This leads to the  
508 possibility that Adr mainly functions when the cells are growing in oxic conditions.

509 To determine if Adr is necessary for symbiosis with a plant host, we performed symbiosis  
510 assays. We found no significant difference between wild-type and the *adr* mutant symbiotic  
511 ability, which indicates that Adr is not essential for symbiosis or nitrogen fixation. This suggests  
512 that under microoxic conditions, prior to bacteroid differentiation, FixJ in conjunction with FixL  
513 are sufficient for mediating expression of the denitrification genes. However, when co-inoculated  
514 on the same plant, we observed that the Rm8530 wild-type strain has a competitive advantage in  
515 forming nitrogen fixing nodules.

516 Taken together with our growth and reductase activity results, we propose that a  
517 functional Adr, along with FixJ, helps prepare *S. meliloti* for symbiosis during the free-living  
518 phase when oxygen concentrations are either too high for FixL to effectively increase  
519 phosphorylated FixJ levels, or during the infection stage when oxygen levels fluctuate and begin  
520 to decrease as the cells enter the nodule. As seen in Figure 8, we have added Adr to the existing  
521 model for denitrification regulation, with a tentative interaction proposed between FixJ and Adr.  
522 Whether Adr is influenced by an effector molecule has yet to be elucidated. We observed  
523 expression of the denitrification genes in wild-type *S. meliloti* in the presence of oxygen and the  
524 absence of denitrification substrates, which can be abolished by the removal of either Adr or  
525 FixJ. Aerobic expression of the denitrification genes may serve multiple purposes, such as  
526 removal of excessive reducing power or reducing toxic NO<sub>x</sub> from the environment around the  
527 cell. Whether directly or indirectly, Adr influences the aerobic expression of the denitrification  
528 genes in *S. meliloti* in conjunction with FixJ. Further study should include elucidation of the



529 possible interaction between FixJ and Adr and the identification and/or isolation of the Adr  
530 effector molecule.

## 531 **Materials and Methods**

532 **Bacterial strains and media.** Strains and plasmids used in this study are listed in Table  
533 1. *S. meliloti* strains were grown at 30° C, 250 rpm in Luria-Bertani media supplemented with 2.5  
534 mM MgSO<sub>4</sub> and 2.5 mM CaCl<sub>2</sub> for routine cultures (referred to as LB/MC). *Escherichia coli*  
535 cultures were grown in Luria-Bertani media with the appropriate antibiotics at 37° C, 250 rpm.  
536 For RNA isolation, *S. meliloti* cultures were grown in tryptone-yeast extract medium  
537 supplemented with 3.6 mM calcium chloride (TYC) or minimal low phosphate (19 mM glutamic  
538 acid, 55 mM mannitol, 0.1 mM K<sub>2</sub>HPO<sub>4</sub>/KH<sub>2</sub>PO<sub>4</sub> mix, 1 mM MgSO<sub>4</sub>, 0.25 mM CaCl<sub>2</sub>, 0.004  
539 mM biotin, pH 7).

540 To screen for recombinant mutants, strains were grown on minimal glutamate media  
541 (MGM) plates (11 g Na<sub>2</sub>HPO<sub>4</sub>, 3 g KH<sub>2</sub>PO<sub>4</sub>, 0.5 g NaCl, 1 g glutamate, 10 g mannitol, 1.5%  
542 agar, 1 mg/ml biotin, 27.8 mg CaCl<sub>2</sub>, and 246 mg MgSO<sub>4</sub>); plates were supplemented with 5%  
543 sucrose when appropriate. Media for growth curves was supplemented with various nitrogen  
544 sources at the following concentrations: 10 mM KNO<sub>3</sub>, or 5 mM NaNO<sub>2</sub>.

545 Antibiotics were used in the following concentrations when appropriate, streptomycin  
546 (Sm) 500 µg/ml, neomycin (Nm) 200 µg/ml, trimethoprim (Tp) 200 µg/ml, spectinomycin (Sp)  
547 100 µg/ml, kanamycin (Km) 25 µg/ml, and chloramphenicol (Cm) 20 µg/ml.

548 **Construction of the *adr* mutant.** *adr* was amplified from *S. meliloti* Rm8530  
549 chromosomal DNA and cloned into the EcoRV site of pPCR-Script, creating the vector p658.  
550 The EZ::TN insertion kit (Epicenter) was used to disrupt the cloned *adr* by transposon  
551 mutagenesis to create p658Tp. The disrupted *adr* was then cloned into the SpeI site of the suicide

552 vector pJQ200SmSp and the resulting recombinant plasmid (pJQ658Tp) was transformed into  
553 DH5 $\alpha$  (25). Triparental mating was performed with DH5 $\alpha$  pJQ658Tp, MT616 (helper strain),  
554 and Rm8530 (49). *S. meliloti* carrying the disrupted copy of *adr* was selected by plating on  
555 minimal media supplemented with Tp and 5% sucrose (50). Mutations were confirmed by PCR  
556 and phage  $\phi$ M12 was used to transduce the *adr* mutation into subsequent strains (51). Primers for  
557 mutant construction and confirmation are listed in Table 2.

558 **Construction of the denitrification mutants.** Internal fragments of *fixJ* and *fixK2* were  
559 cloned into pK19mob $\Omega$ HMB creating recombinant vectors harbored in *E. coli* S17- $\lambda$ pir (Table  
560 1). These vectors were provided by Dr. Anke Becker from the Philipps University of Marburg,  
561 Germany. The vector carrying *fixK2* was modified by inserting a hygromycin cassette cloned  
562 from pMB419 into the Km cassette of the pK19fixK2 backbone. Vectors were transferred via bi-  
563 parental mating into *S. meliloti* Rm8530 and recombinants were selected by plating on minimal  
564 media with the appropriate antibiotics. Mutations were confirmed by PCR and phage  $\phi$ M12 was  
565 used to transduce the *fixJ* mutation in Rm8530 658::Tp (51).

566 To construct the *fixK1 fixK2* double mutant, an internal fragment of *fixK1* was cloned into  
567 pVIK112 to create pVIKfixK1. This vector was transferred via tri-parental mating into the  
568 Rm8530 *fixK2*::Hy strain. Mutations were confirmed by PCR.

569 *S. meliloti* Rm2011 containing a Tn5 mutation in *fixL* was also provided by Dr. Anke  
570 Becker. This mutation was transferred into Rm8530 by phage  $\phi$ M12 and plated on LB agar with  
571 the appropriate antibiotics (51). Mutations were confirmed by PCR.

572 **RNA purification and cDNA synthesis.** Bacterial cultures were grown for two days in  
573 LB/MC and appropriate antibiotics. A 1:100 dilution was used to inoculate 20 ml of TY media  
574 supplemented with Sm. Cultures were grown aerobically to OD<sub>600</sub> 0.2 (lag), 0.8 (mid log), or 1.2

575 (stationary). After reaching the appropriate growth stage, 1.5 ml aliquots of culture were  
576 harvested by centrifugation (14,500 rpm for 2 minutes at 4° C), immediately frozen in liquid  
577 nitrogen, and stored at -80° C for future use. RNA purification was performed using the RNeasy  
578 Mini Kit (Qiagen) with slight modifications. Briefly, cells were thawed on ice then resuspended  
579 in 10 mM Tris HCl (pH 8) and RLT buffer provided from the Qiagen kit (supplemented with  $\beta$ -  
580 mercaptoethanol). The cells were transferred to FastProtein tubes (Qbiogene) and disrupted using  
581 an MP FastPrep-24 ribolyser (40s, speed 6.5). Spin column purification was performed  
582 according to the RNeasy Mini Kit RNA purification protocol. After the first round of  
583 purification, samples were treated with Qiagen on column RNase-free DNase. The RNA samples  
584 were eluted and DNase treated a second time with the Ambion TURBO RNase-free DNase  
585 which was followed by an RNA clean up step. Concentration of RNA was determined by  
586 Nanodrop and DNA contamination was assessed by qRT-PCR. cDNA for each strain was  
587 synthesized with the Ambion RETROscript kit according to the manufacturer's protocol. 1  $\mu$ g of  
588 total RNA was used per cDNA synthesis reaction.

589 **Affymetrix GeneChip hybridization and expression analysis.** The cDNA synthesis  
590 was performed using 10  $\mu$ g of RNA harvested from cells grown to OD<sub>600</sub> 1.2. Hybridization of  
591 the cDNA to the GeneChip Medicago Genome Array (Affymetrix, Santa Carla, CA) was  
592 performed at the Core Microarray facility at UT Southwestern Medical Center (Dallas, TX) as  
593 previously described (27, 32). The GeneChip Scanner 3000 was used to measure the signal  
594 intensity of each array. Affymetrix GeneChip Operating Software, (GCOS v 1.4) was used to  
595 generate the .CEL files. Comparative analysis of the control and experimental expression were  
596 represented in terms of M-value (signal log ratio) which also indicated an increase, decrease, or

597 lack of change in expression of a gene in the mutant with respect to the wild-type. An  $M$ -value  $\geq$   
598 1 (2-fold change) with a  $p$ -value of  $\leq 0.05$  were considered significant.

599 **Quantitative real-time PCR.** Oligonucleotide sequences used for qRT-PCR are listed in  
600 Table 3. The reaction mixture for qRT-PCR analysis contained 0.3  $\mu\text{M}$  of sense primer, 0.3  $\mu\text{M}$   
601 of antisense primer, 0.5X of SYBR green 1 (Sigma), 0.5 Omni Mix HS PCR bead (contains 1.5  
602 U *Taq* DNA polymerase, 10 mM Tris-HCl [pH 9.0], 50 mM KCl, 1.5 mM  $\text{MgCl}_2$ , 200  $\mu\text{M}$   
603 deoxynucleotide triphosphate, and stabilizers), and 1  $\mu\text{l}$  of cDNA. Total reaction volume was 25  
604  $\mu\text{l}$ . Analysis was performed using a Cepheid Smart Cycler, version 2.0c as previously described  
605 (32). Expression analyses were conducted in triplicate. The expression of *SMc00128* was used as  
606 an internal control and for normalization, as described previously (52, 53). Expression analysis  
607 were performed as three independent experiments.

608 **Growth analysis.** Cells for all growth curves were grown to saturation in LB/MC with  
609 appropriate antibiotics. Aerobic growth curves were performed using a Tecan plate reader (29°  
610 C, shaking at 250 rpm). Cells were diluted 1:100 in TYC media, TYC with 10 mM  $\text{KNO}_3$ , or  
611 TYC with 5 mM  $\text{NaNO}_2$  and added to a 96 well plate.  $\text{OD}_{600}$  readings were taken every 30  
612 minutes.

613 Microaerobic conditions were also tested. Starter cultures were diluted to an initial  $\text{OD}_{600}$   
614 of 0.2, then 2 ml of each culture was added to each vial. Once sealed, the vials were sparged with  
615 a mixture of 2% oxygen, 98% argon for one minute. Vials were incubated at 30° C, shaking at  
616 250 rpm and  $\text{OD}_{600}$  was measured every 24 hours. We refer to aerated cultures to differentiate  
617 between aerobic cultures grown with free gas exchange with the environment and intentionally  
618 oxygen restricted (microaerobic) cultures.

619           Viable counts were performed for both aerobic and microaerobic cultures. Several  
620 dilutions were plated on LB agar with the appropriate antibiotics. Plates were incubated for  
621 several days at 30° C before colonies were counted by hand. Nitrite levels of cultures were  
622 qualitatively assessed using nitrite test strips (0-80 mg/L or 0-10 mg/L, EMD Millipore).

623           **Media complementation assay.** Cells were grown in the same manner as those grown  
624 for RNA pellets. Cultures were grown to OD<sub>600</sub> of 1.2 in TYC media with Sm. Cells were  
625 removed from the media by centrifugation (3 x 6000 rpm, 30 minutes, 4° C) and the resulting  
626 supernatant was passed through a 0.22 µm filter (Fisher) and stored at 4° C. Glucose (100 mM)  
627 and glutamate (19 mM) were added to the spent media to replace depleted nutrients. To  
628 determine if the spent media contained effector molecules that are detected by or that activate  
629 *adr*, cultures were grown to OD<sub>600</sub> of 0.2 and then harvested for RNA in the manner described  
630 above.

631           **Methyl viologen assay for nitrate and nitrite reductase activity.** Starter cultures were  
632 grown aerobically in TYC media with appropriate drugs for two days. Cells were then spun  
633 down (2 minutes, 14,000 rpm), and diluted to an initial OD<sub>600</sub> of 0.2 in MLP supplemented with  
634 Sm and 0.5 µM NaMoO<sub>4</sub>. Cells grown aerobically were harvested at OD<sub>600</sub> of 1.2 by spinning  
635 down 1 ml of culture (two minutes, 14,000 rpm, 4° C), removing the supernatant, and  
636 immediately freezing the cell pellet in liquid nitrogen. Microaerobically grown cells were  
637 harvested at OD<sub>600</sub> of 0.5-0.6 (stationary phase for microaerobic cultures).

638           Samples were assayed for either nitrate or nitrite reductase activity using methyl viologen  
639 as the electron donor as previously described (37, 54). Cell pellets were resuspended in 10 mM  
640 HEPES buffer (pH 7) and 1 mM methyl viologen to a final volume of 1 ml. The cuvettes were  
641 sealed and sparged for five minutes with nitrogen gas. Methyl viologen was reduced by adding

642 aliquots of freshly prepared aqueous sodium dithionite until a steady state absorbance of 1-1.5 at  
643 600 nm was obtained. Substrate (10 mM nitrate or nitrite) was added, and the rate of absorbance  
644 decrease measured. The rate of substrate-dependent methyl viologen oxidation was calculated  
645 using  $13 \text{ mM}^{-1} \text{ cm}^{-1}$  as the extinction coefficient of reduced methyl viologen (55). Protein  
646 concentrations were measured by the Bradford method (Bio-Rad) and used to determine specific  
647 activities. All strains were measured in triplicate.

648 **Plant symbiosis assays.** Infection assays of *Medicago sativa* were performed to  
649 determine nodulation and nitrogen fixation efficiency of the *S. meliloti* mutant strains Rm8530  
650 *adr*, Rm8530 *fixJ*, and Rm8530 *fixJ adr* compared to wild-type Rm8530. *M. sativa* was  
651 inoculated with *S. meliloti* strains on Jensen's agar plates as previously described (56). Plants  
652 were grown in a 16-hour light cycle at 20° C and in 65% humidity. Weekly inspections of roots  
653 and plant health were performed beginning the second week post inoculation. Nitrogen fixing  
654 nodules, empty nodules, and plant height were recorded for approximately 60 plants per strain  
655 tested. Data shown was collected fourth week post inoculation.

656 **Plant symbiosis competition assay.** Five dilutions (100:1, 10:1, 1:1, 1:10, and 1:100) of  
657 Rm8530 to Rm8530 *adr* were tested for competitive nodulation of *M. sativa*. Strains were grown  
658 for two days in LB/MC with antibiotics, washed three times with sterile water, then diluted 1:100  
659 in water. These dilutions were then mixed to obtain the appropriate ratio of wild-type to mutant.  
660 A portion of the mixed inoculum was diluted and plated on the appropriate antibiotics to  
661 determine cell viability. *M. sativa* seedlings were inoculated with 1 ml of the dilution and plants  
662 were grown in the same conditions discussed above. Harvested nodules were washed in 50%  
663 bleach for five minutes and rinsed three times with sterile water. After rinsing, each nodule was  
664 added to a well of a microtiter plate and crushed in LB/MC supplemented with 0.3 M glucose.

665 The bacteria released from the crushed nodules were diluted, divided in half, and plated on  
666 LB/MC Sm and LB/MC Tp. Colony PCR was used to confirm the genetic background of the  
667 strains. Nodulation competitiveness was tested twice for each dilution.

668 **Acknowledgements**

669 We thank Anke Becker and Jacques Batut for providing strains. We also thank Stephen  
670 Spiro for his assistance with the methyl viologen and nitrite detection assays and for reviewing  
671 this manuscript. Finally, we thank Nymisha Avadhanam for reading and giving feedback on the  
672 manuscript. Our work was supported by National Science Foundation grant MCB-9733532 and  
673 National Institutes of Health grant 1R01GM069925 to J.E.G.

674

675

## References

- 676 1. **García-Plazaola JI, Becerril JM, Arrese-Igor C, Hernandez AG-M, C. , Aparicio-**  
677 **Tejo PM.** 1993. Denitrifying ability of thirteen *Rhizobium meliloti* strains. Plant and Soil  
678 **149**:43-50.
- 679 2. **Zumft WG.** 1997. Cell biology and molecular basis of denitrification. Microbiol Mol  
680 Biol Rev **61**:533-616.
- 681 3. **Fischer HM.** 1994. Genetic regulation of nitrogen fixation in bacteria. Microbiological  
682 Reviews **58**:352-386.
- 683 4. **Lucinski R, Polcyn W, Ratajczak L.** 2002. Nitrate reduction and nitrogen fixation in  
684 symbiotic association *Rhizobium*-legumes. Acta Biochim Pol **49**:537-546.
- 685 5. **Chen J, Strous M.** 2013. Denitrification and aerobic respiration, hybrid electron  
686 transport chains and co-evolution. Biochim Biophys Acta **1827**:136-144.
- 687 6. **García-Plazaola JI, Becerril JM, Arrese-Igor C, González-Murua C, Aparicio-Tejo**  
688 **PM.** 1993. The contribution of *Rhizobium meliloti* to soil denitrification. Plant and Soil  
689 **157**:207-213.
- 690 7. **Torres MJ, Rubia MI, Bedmar EJ, Delgado MJ.** 2011. Denitrification in  
691 *Sinorhizobium meliloti*, p. 1886-1889, Biochem. Soc. Trans., vol. 39.
- 692 8. **Dazzo FB, Brill WJ.** 1978. Regulation by Fixed Nitrogen of Host-Symbiont Recognition  
693 in the *Rhizobium*-Clover Symbiosis. Plant Physiol **62**:18-21.
- 694 9. **del Giudice J, Cam Y, Damiani I, Fung-Chat F, Meilhoc E, Bruand C, Brouquisse**  
695 **R, Puppo A, Boscari A.** 2011. Nitric oxide is required for an optimal establishment of  
696 the *Medicago truncatula*--*Sinorhizobium meliloti* symbiosis. New Phytol **191**:405-417.



- 697 10. **Minchin FR, Minguez MI, Sheehy JE, Witty JF, Skot L.** 1986. Relationships Between  
698 Nitrate and Oxygen Supply in Symbiotic Nitrogen Fixation by White Clover. *Journal of*  
699 *Experimental Botany* **37**:1103-1113.
- 700 11. **David M, Daveran ML, Batut J, Dedieu A, Domergue O, Ghai J, Hertig C, P.**  
701 **Boistard, Kahn D.** 1988. Cascade regulation of the *nif* gene expression in *Rhizobium*  
702 *meliloti*. *Cell* **54**:671-683.
- 703 12. **Lois AF, Weinstein M, Ditta GS, Helinski DR.** 1993. Autophosphorylation and  
704 Phosphatase Activities of the Oxygen-sensing Protein FixL of *Rhizobium meliloti* Are  
705 Coordinately Regulated by Oxygen. *J Biol Chem* **268**:4370-4375.
- 706 13. **Da Re S, Bertagnoli S, Fourment J, Reyrat J, Kahn D.** 1994. Intramoleculat signal  
707 transduction within the FixJ transcriptional activator: *in vitro* evidence for the inhibitory  
708 effet of the phosphoyrlatable regulator domain. *Nucleic Acids Res* **22**:1555-1561.
- 709 14. **Da Re S, Schumacher J, Rousseau P, Fourment J, Ebel C, Kahn D.** 1999.  
710 Phosphorylation-induced dimerization of the FixJ reciever domain. *Mol Microbiol*  
711 **34**:504-511.
- 712 15. **Karashima-Ito K, Kasai Y, Hosono K, Tamura K, Oue S, Isogai M, Ito Y,**  
713 **Nakamura H, Shiro Y.** 2005. Solution structure of the C-terminal transcriptional  
714 activator domain of FixJ from *Sinorhizobium meliloti* and its recognition of the *fixK*  
715 promoter. *Biochemistry* **44**:14835-14844.
- 716 16. **Terpolilli JJ, Hood GA, Poole PS.** 2012. What Determines the Efficiency of N<sub>2</sub>-Fixing  
717 *Rhizobium*-Legume Symbioses? *Adv. Microb. Physiol.* **60**:325-389.

- 718 17. **Bobik C, Meilhoc E, Batut J.** 2006. FixJ: a major regulator of the oxygen limitation  
719 response and late symbiotic functions of *Sinorhizobium meliloti*. J Bacteriol **188**:4890-  
720 4902.
- 721 18. **Ferrieres L, Francez-Chralot A, Gouzy J, Rouille S, Kahn D.** 2004. FixJ-regulated  
722 genes evolved through promoter duplication in *Sinorhizobium meliloti*. Microbiology  
723 **150**:2335-2345.
- 724 19. **Batut J, Daveran-Mingot ML, David M, Jacobs J, Garnerone AM, Kahn D.** 1989.  
725 *fixK*, a gene homologous with *fnr* and *crp* from *Escherichia coli*, regulates nitrogen  
726 fixation genes both positively and negatively in *Rhizobium meliloti*. Embo J **8**:1279-  
727 1286.
- 728 20. **Garnerone A, Cabanes D, Foussard M, Boistard P, Batut J.** 1999. Inhibition of the  
729 FixL Sensor Kinase by the FixT Protein in *Sinorhizobium meliloti*. J Biol Chem  
730 **274**:32500-32506.
- 731 21. **Berges H, Checroun C, Guiral S, Garnerone A, Boistard P, Batut J.** 2001. A  
732 glutamine-amidotransferase-like protein modulates FixT anti-kinase activity in  
733 *Sinorhizobium meliloti*. BMC Microbiol **1**.
- 734 22. **Foussard M, Garnerone AM, Ni F, Soupene E, Boistard P, Batut J.** 1997. Negative  
735 autoregulation of the *Rhizobium meliloti fixK* gene is indirect and requires a newly  
736 identified regulator, FixT. Mol Microbiol **25**:27-37.
- 737 23. **Meilhoc E, Cam Y, Skapski A, Bruand C.** 2009. The Response to Nitric Oxide of the  
738 Nitrogen-Fixing Symbiont *Sinorhizobium meliloti*. Mol Plant Microbe Interact **23**:748-  
739 759.

- 740 24. **Dixon R, Kahn D.** 2004. Genetic Regulation of Biological Nitrogen Fixation *Nat Rev*  
741 *Microbiol* **2**:621-631.
- 742 25. **Marketon MM, González JE.** 2002. Identification of two quorum-sensing systems in  
743 *Sinorhizobium meliloti*. *J Bacteriol* **184**:3466-3475.
- 744 26. **Fuqua C, Parsek MR, Greenberg EP.** 2001. Regulation of gene expression by cell-to-  
745 cell communication: acyl-homoserine lactone quorum sensing. *Annu Rev Genet* **35**:439-  
746 468.
- 747 27. **Hoang HH, Gurich N, González JE.** 2008. Regulation of motility by the ExpR/Sin  
748 quorum-sensing system in *Sinorhizobium meliloti*. *J Bacteriol* **190**:861-871.
- 749 28. **Marketon MM, Gronquist MR, Eberhard A, González JE.** 2002. Characterization of  
750 the *Sinorhizobium meliloti sinR/sinI* locus and the production of novel *N*-acyl homoserine  
751 lactones. *J Bacteriol* **184**:5686-5695.
- 752 29. **Patankar AV, González JE.** 2009. An orphan LuxR homolog of *Sinorhizobium meliloti*  
753 affects stress adaptation and competition for nodulation. *Appl Environ Microbiol* **75**:946-  
754 955.
- 755 30. **Whitehead NA, Barnard AM, Slater H, Simpson NJ, Salmond GP.** 2001. Quorum-  
756 sensing in Gram-negative bacteria. *FEMS Microbiol Rev* **25**:365-404.
- 757 31. **Hao G, Zhang H, Zheng D, Burr TJ.** 2005. *luxR* homolog *avhR* in *Agrobacterium vitis*  
758 affects the development of a grape-specific necrosis and a tobacco hypersensitive  
759 response. *J Bacteriol* **187**:185-192.
- 760 32. **Glenn SA, Gurich N, Feeney MA, González JE.** 2007. The ExpR/Sin quorum-sensing  
761 system controls succinoglycan production in *Sinorhizobium meliloti*. *J Bacteriol*  
762 **189**:7077-7088.

- 763 33. **Barnett MJ, Fisher RF, Jones T, Komp C, Abola AP, Barloy-Hubler F, Bowser L,**  
764 **Capela D, Galibert F, Gouzy J, Gurjal M, Hong A, Huizar L, Hyman RW, Kahn D,**  
765 **Kahn ML, Kalman S, Keating DH, Palm C, Peck MC, Surzycki R, Wells DH, Yeh**  
766 **KC, Davis RW, Federspiel NA, Long SR.** 2001. Nucleotide sequence and predicted  
767 functions of the entire *Sinorhizobium meliloti* pSymA megaplasmid. Proc Natl Acad Sci  
768 USA **98**:9883-9888.
- 769 34. **Ferrieres L, Francez-Charlot A, Gouzy J, Rouille S, Kahn D.** 2004. FixJ-regulated  
770 genes evolved through promoter duplication in *Sinorhizobium meliloti*. Microbiology  
771 **150**:2335-2345.
- 772 35. **Galibert F, Finan TM, Long SR, Pühler A, Abola P, Ampe F, Barloy-Hubler F,**  
773 **Barnett MJ, Becker A, Boistard P, Bothe G, Boutry M, Bowser L, Buhrmester J,**  
774 **Cadiou E, Capela D, Chain P, Cowie A, Davis RW, Dreano S, Federspiel NA, Fisher**  
775 **RF, Gloux S, Godrie T, Goffeau A, Golding B, Gouzy J, Gurjal M, Hernandez-**  
776 **Lucas I, Hong A, Huizar L, Hyman RW, Jones T, Kahn D, Kahn ML, Kalman S,**  
777 **Keating DH, Kiss E, Komp C, Lelaure V, Masuy E, Palm C, Peck MC, Pohl TM,**  
778 **Portetelle D, Purnelle B, Ramsperger U, Surzycki R, Thebault P, Vandenbol M,**  
779 **Vorholter FJ, Weidner S, Wells DH, Wong K, Yeh KC, Batut J.** 2001. The composite  
780 genome of the legume symbiont *Sinorhizobium meliloti*. Science **293**:668-672.
- 781 36. **Torres MJ, Rubia MI, de la Pena TC, Pueyo J, Bedmar EJ, Delgado MJ.** 2014.  
782 Genetic basis for denitrification in *Ensifer meliloti*. BMC Microbiol **14**:142-151.
- 783 37. **Bell LC, Richardson DJ, Ferguson SJ.** 1990. Periplasmic and membrane-bound  
784 respiratory nitrate reductases in *Thiosphaera pantotropha*. FEBS Lett **265**:85-87.

- 785 38. **Anthamatten D, Scherb B, Hennecke H.** 1992. Characterization of a *fixLJ*-regulated  
786 *Bradyrhizobium japonicum* gene sharing similarity with the *Escherichia coli fnr* and  
787 *Rhizobium meliloti fixK* genes. J Bacteriol **174**:2111-2120.
- 788 39. **Hartig E, Schiek U, Vollack KU, Zumft WG.** 1999. Nitrate and nitrite control of  
789 respiratory nitrate reduction in denitrifying *Pseudomonas stutzeri* by a two-component  
790 regulatory system homologous to NarXL of *Escherichia coli*. J Bacteriol **181**:3658-3665.
- 791 40. **Stewart V, Parales J, Jr., Merkel SM.** 1989. Structure of genes *narL* and *narX* of the  
792 *nar* (nitrate reductase) locus in *Escherichia coli* K-12. J Bacteriol **171**:2229-2234.
- 793 41. **Hayatsu M, Tago K, Saito M.** 2008. Various players in the nitrogen cycle: Diversity and  
794 functions of the microorganisms involved in nitrification and denitrification. Jpn. J. Soil  
795 Sci. Plant Nutr. **54**:33-45.
- 796 42. **Kraft B, Strous M, Tegetmeyer HE.** 2011. Microbial nitrate respiration -- Genes,  
797 enzymes, and environmental distribution. Journal of Biotechnology **155**:104-117.
- 798 43. **Van Cleemput O, Samater AH.** 1996. Nitrite in soils: accumulation and role in the  
799 formation of gaseous N compounds. Fertilizer Research **45**:81-89.
- 800 44. **Casella S, Shapleigh JP, Payne WJ.** 1986. Nitrite reduction in *Rhizobium hedysarii*  
801 strain HCNT 1. Arch Microbiol **146**:233-238.
- 802 45. **Ji B, Yang K, Zhu L, Wang H, Zhou J, Zhang H.** 2015. Aerobic Denitrification: A  
803 Review of Important Advances of the Last 30 Years. Biotechnol Bioprocess Eng **20**:643-  
804 651.
- 805 46. **Berks BC, Ferguson SJ, Moir JWB, Richardson DJ.** 1995. Enzymes and associated  
806 electron transport systems that catalyse the respiratory reduction of nitrogen oxides and  
807 oxyanions. Biochim Biophys Acta **1232**:97-173.

- 808 47. **Flanagan DA, Gregory LG, Carter JP, Karakas-Sen A, Richardson DJ, Spiro S.**  
809 1999. Detection of genes for periplasmic nitrate reductase in nitrate respiring bacteria and  
810 in community DNA. *Fems Microbiol Lett* **177**:263-270.
- 811 48. **de Bruijn FJ, Rossbach S, Bruand C, Parrish JR.** 2006. A highly conserved  
812 *Sinorhizobium meliloti* operon is induced microaerobically via the FixLJ system and by  
813 nitric oxide (NO) via NnrR. *Environ Microbiol* **8**:1371-1381.
- 814 49. **Glazebrook J, Walker GC.** 1991. Genetic techniques in *Rhizobium meliloti*. *Methods*  
815 *Enzymol* **204**:398-418.
- 816 50. **Quandt J, Hynes MF.** 1993. Versatile suicide vectors which allow direct selection for  
817 gene replacement in Gram-negative bacteria. *Gene* **127**:15-21.
- 818 51. **Finan TM, Hartweig E, LeMieux K, Bergman K, Walker GC, Signer ER.** 1984.  
819 General transduction in *Rhizobium meliloti*. *J Bacteriol* **159**:120-124.
- 820 52. **Krol E, Becker A.** 2004. Global transcriptional analysis of the phosphate starvation  
821 response in *Sinorhizobium meliloti* strains 1021 and 2011. *Mol Genet Genomics* **272**:1-  
822 17.
- 823 53. **Hoang HH, Becker A, González JE.** 2004. The LuxR homolog ExpR, in combination  
824 with the Sin quorum sensing system, plays a central role in *Sinorhizobium meliloti* gene  
825 expression. *J Bacteriol* **186**:5460-5472.
- 826 54. **Craske A, Ferguson SJ.** 1986. The respiratory nitrate reductase from *Paracoccus*  
827 *denitrificans*. *Eur J Biochem* **158**:429-436.
- 828 55. **Jones RW, Garland PB.** 1977. Sites and specificity of the reaction of bipyridylum  
829 compounds with anaerobic respiratory enzymes of *Escherichia coli*. *Biochem J* **164**:199-  
830 211.

- 831 56. **Leigh JA, Signer ER, Walker GC.** 1985. Exopolysaccharide-deficient mutants of  
832 *Rhizobium meliloti* that form ineffective nodules. Proc Natl Acad Sci USA **82**:6231-  
833 6235.
- 834 57. **Pellock BJ, Teplitski M, Boinay RP, Bauer WD, Walker GC.** 2002. A LuxR homolog  
835 controls production of symbiotically active extracellular polysaccharide II by  
836 *Sinorhizobium meliloti*. J Bacteriol **184**:5067-5076.
- 837 58. **Simon R, Priefer U, Puhler A.** 1983. A broad-host range mobilization system for in  
838 vivo genetic engineering: transposon mutagenesis in gram-negative bacteria. Bio  
839 Technology **1**:784-791.
- 840 59. **Kalogeraki VS, Winans SC.** 1997. Suicide plasmids containing promoterless reporter  
841 genes can simultaneously disrupt and create fusions to target genes of diverse bacteria.  
842 Gene **188**:69-75.
- 843 60. **Barnett MJ, Oke V, Long SR.** 2000. New genetic tools for use in the *Rhizobiaceae* and  
844 other bacteria. BioTechniques **29**:240-245.

845  
846

847

**Table 1. Strains and Plasmids**

848

| Strains or plasmids    | Relevant characteristics                                        | Reference or source |
|------------------------|-----------------------------------------------------------------|---------------------|
| <i>S. meliloti</i>     |                                                                 |                     |
| Rm8530                 | Su47 <i>str-21</i> , <i>expR</i> <sup>+</sup> , Sm <sup>R</sup> | (57)                |
| Rm8530 <i>adr</i>      | <i>SMc00658::Tp</i>                                             | This work           |
| Rm8530 <i>fixJ</i>     | <i>fixJ::Nm</i>                                                 | This work           |
| Rm8530 <i>fixJ adr</i> | <i>SMc00658::Tp fixJ::Nm</i>                                    | This work           |
| Rm8530 <i>fixL</i>     | <i>fixL::Nm</i>                                                 | This work           |
| <i>E. coli</i>         |                                                                 |                     |
| DH5α                   | See source                                                      | Life Technologies   |
| MT616                  | MT607(pRK600)                                                   | (49)                |
| S17-λpir               | See source                                                      | (58)                |
| Plasmids               |                                                                 |                     |
| pPCR-Script            | See source, Amp <sup>R</sup>                                    | Stratagene          |
| pVIK112                | <i>lacZY</i> for transcriptional fusions,<br>Km <sup>R</sup>    | (59)                |
| pJQ200SmSp             | Suicide vector, <i>sacB</i> , Gm <sup>R</sup>                   | (25)                |
| pMB419                 | Vector carrying Hygromycin cassette                             | (60)                |
| p658                   | pPCR-Script carrying <i>SMc00658</i>                            | This work           |
| p658Tp                 | pPCR-Script carrying <i>SMc00658</i><br>disrupted with Tp       | This work           |
| pJQ658Tp               | pJQ200 SmSp carrying<br><i>SMc00658::Tp</i>                     | This work           |
| pVIKfixK1              | pVIK112 carrying <i>fixK1</i> fragment                          | This work           |
| pK19fixK2              | pK19mobΩHMB carrying <i>fixK2</i><br><i>fragment</i>            | Anke Becker         |
| pK19fixK2Hy            | pK19mobΩHMB carrying <i>fixK2::Hy</i>                           | This work           |



849

**Table 2. Primers used for mutant construction**

850

| <b>Gene</b>     | <b>Forward Primer</b>                  | <b>Reverse Primer</b>                     |
|-----------------|----------------------------------------|-------------------------------------------|
| <i>658-SpeI</i> | GCACTAGTCGCAGACGCGGCG<br>GGCGTCGTC     | CGACTAGTGTGGCGATATTGCT<br>GGATGCGCGTC     |
| <i>Hy-BspHI</i> | ATATATATCATGAGCTGCAGAA<br>AGGAATTACCAC | ATATATATCATGACTAGTAACA<br>TAGATGACACCGCGC |
| <i>fixK2</i>    | CGAAGCGGCTAAGTAGTT                     | TCCTTCAGTTTCGTCACC                        |
| <i>fixK1</i>    | TCCTTCAGTTTCGTCACC                     | GATATTACACGGAATCCTACGA                    |
| <i>fixJ</i>     | GCCATCAACCAGCAGTA                      | CACATTGTTGATGACGAGAG                      |
| <i>fixL</i>     | TTCTTCACGGGCTTCATC                     | CTTCAACGACGACTGCTA                        |

851

852

**Table 3. qRT-PCR Primers**

853

| <b>Gene</b>  | <b>Forward Primer</b>    | <b>Reverse Primer</b>  |
|--------------|--------------------------|------------------------|
| <i>norC</i>  | CACCGCTTCCACACATTG       | ACTATTACATGAAGACCGAATC |
| <i>nirK</i>  | CCTTGTCATAGGTAATTGAATTGC | CCTCCAGGCATGGTTCCG     |
| <i>nosZ</i>  | GCATCCCTCGTTTACAGAC      | AGTGTGCTGGTTCGGAAG     |
| <i>napA</i>  | ACGCCTTGTAGAGTTCCG       | ATCTCCCGACGACGAATAC    |
| <i>nifA</i>  | GCCGAAGAGTCCGATTATGAT    | CTGCTGATTGTGCGATGAAG   |
| <i>fixQ1</i> | CTCGCAATGACGTTGTTCTT     | TCCTCCTTTAACGGGATGAC   |
| <i>fixJ</i>  | CACATTGTTGATGACGAAGAG    | TTCAGATCGCCGAGATTG     |
| <i>nnrR</i>  | ACTCAGGAAGTGGAGCGGCG     | TGCAGCGTGGTTCGGGTCAT   |
| <i>fixK</i>  | CGGAATATGCAGGAGCGTTCG    | CACATTGCCTGCCGATTACCA  |
| <i>adr</i>   | TGCCGGTATGGGTCACTTCG     | TAGCGCCAGATAGAGCGTCG   |
| <i>nifH</i>  | ATATCGTTCAGCACGCAG       | GTCGCTCTTCATGATTCC     |
| <i>fixG</i>  | TACGTCTTCGGCGGACTGAT     | GTTCTCGTCTAGCATGGCCG   |
| <i>fixA</i>  | GGCGTGCCGACCATTATCAA     | AAATGGCGGTTCGGTCAAGAG  |

854

855

**Table 4. Comparison of the FixJ by Bobik, et al. and the Adr microarray**

856

| <b>Group and Gene Name</b> | <b>Gene product or description</b>                      |
|----------------------------|---------------------------------------------------------|
| <b>A.</b>                  | <b>Overlap of Adr and FixJ regulation</b>               |
| SMa0630                    | conserved hypothetical transmembrane protein            |
| SMa0631                    | hypothetical protein                                    |
| SMa0633                    | hypothetical protein                                    |
| SMa0636                    | conserved hypothetical protein                          |
| SMa0661                    | conserved hypothetical protein                          |
| SMa0667                    | conserved hypothetical protein                          |
| SMa0669                    | hypothetical transmembrane protein, HlyD-family         |
| SMa0678                    | putative amino acid transporter                         |
| SMa0680                    | decarboxylase (lysine, ornithine, arginine)             |
| SMa0682                    | decarboxylase (lysine, ornithine, arginine)             |
| SMa0684                    | amino acid transporter                                  |
| SMa0687                    | hypothetical protein                                    |
| SMa0689                    | conserved hypothetical protein                          |
| SMa0690                    | hypothetical protein                                    |
| SMa0693                    | <i>arcA1</i> ; arginine deiminase                       |
| SMa0695                    | <i>arcB</i> ; ornithine carbamoyltransferase, catabolic |
| SMa0697                    | <i>arcC</i> ; carbamate kinase                          |
| SMa0760                    | <i>fixT2</i> ; anti-kinase protein                      |
| SMa0762 <sup>a</sup>       | <i>fixK2</i> ; transcriptional regulator                |
| SMa0763                    | hypothetical protein                                    |
| SMa0765                    | <i>fixN2</i> ; cytochrome c oxidase subunit I           |
| SMa0771                    | hypothetical protein                                    |
| SMa1013                    | <i>actP</i> ; Copper translocating P-type ATPase        |
| SMa1082                    | hypothetical protein                                    |
| SMa1084                    | probable phosphoketolase                                |
| SMa1086                    | conserved hypothetical protein                          |
| SMa1087                    | cation transport ATPase                                 |
| SMa1089                    | hypothetical protein                                    |
| SMa1091                    | hypothetical protein                                    |
| SMa1093                    | hypothetical protein                                    |
| SMa1095                    | hypothetical protein                                    |
| SMa1100                    | conserved hypothetical protein                          |
| SMa1101                    | hypothetical protein                                    |
| SMa1118                    | <i>hspC</i> ; heat shock protein                        |
| SMa1120                    | ABC transporter, ATP-binding protein                    |
| SMa1126                    | putative protease, transmembrane protein                |
| SMa1128                    | <i>degP</i> ; protease like protein                     |

|                      |                                                         |
|----------------------|---------------------------------------------------------|
| SMa1131              | metallo-beta-lactamase superfamily protein              |
| SMa1132              | hypothetical protein                                    |
| SMa1134              | conserved hypothetical protein                          |
| SMa1136              | hypothetical protein                                    |
| SMa1146              | conserved hypothetical protein                          |
| SMa1147              | conserved hypothetical protein                          |
| SMa1149              | conserved hypothetical protein                          |
| SMa1151              | conserved hypothetical protein                          |
| SMa1153              | conserved hypothetical protein                          |
| SMa1154              | conserved hypothetical protein                          |
| SMa1155              | cation transport P-type ATPase                          |
| SMa1156              | alcohol dehydrogenase, Zn-dependent class III           |
| SMa1158              | conserved hypothetical protein                          |
| SMa1163              | cation transport P-type ATPase                          |
| SMa1166              | protein containing an alpha/beta hydrolase fold         |
| SMa1168              | dehydrogenase, FAD-dependent                            |
| SMa1169              | hypothetical protein                                    |
| SMa1170              | conserved hypothetical protein                          |
| SMa1176              | hypothetical protein                                    |
| SMa1179              | <i>nosR</i> ; regulatory protein                        |
| SMa1182 <sup>a</sup> | <i>nosZ</i> ; nitrous oxide reductase                   |
| SMa1183              | <i>nosD</i> ; nitrous oxidase accessory protein         |
| SMa1184              | <i>nosF</i> ; ATPase (Should most if these be italics?) |
| SMa1185              | <i>nosY</i> ; permease                                  |
| SMa1186              | <i>nosL</i> ; copper chaperone                          |
| SMa1188              | <i>nosX</i> ; accessory protein                         |
| SMa1191              | <i>hmp</i> ; Flavohemoprotein                           |
| SMa1195              | conserved hypothetical protein                          |
| SMa1200              | conserved hypothetical protein                          |
| SMa1201              | hypothetical protein                                    |
| SMa1207              | transcriptional regulator, CAP/Crp family               |
| SMa1208              | <i>fixS</i> ; nitrogen fixation protein                 |
| SMa1209              | <i>fixII</i> ; ATPase                                   |
| SMa1210              | <i>fixH</i> ; nitrogen fixation protein                 |
| SMa1211 <sup>a</sup> | <i>fixG</i> ; iron sulfur membrane protein              |
| SMa1213              | <i>fixP1</i> ; di-heme c-type cytochrome                |
| SMa1214 <sup>a</sup> | <i>fixQ1</i> ; nitrogen fixation protein                |
| SMa1216              | <i>fixO1</i> ; cytochrome C oxidase subunit             |
| SMa1220              | <i>fixN1</i> ; cytochrome c oxidase subunit 1           |
| SMa1223              | <i>fixM</i> ; flavoprotein oxidoreductase               |
| SMa1225 <sup>a</sup> | <i>fixK1</i> ; transcriptional regulator                |
| SMa1226              | <i>fixT1</i> ; antikinase protein                       |
| SMa1231              | conserved hypothetical protein                          |

|                      |                                                                 |
|----------------------|-----------------------------------------------------------------|
| SMa1236 <sup>a</sup> | <i>napA</i> ; periplasmic nitrate reductase                     |
| SMa1240              | <i>napF</i> ; component of periplasmic nitrate reductase        |
| SMa1241              | <i>napE</i> ; component of periplasmic nitrate reductase        |
| SMa1243              | <i>azuI</i> ; pseudoazurin                                      |
| SMa1256              | conserved hypothetical protein                                  |
| SMa1259              | conserved hypothetical protein                                  |
| SMa1266              | <i>hemN</i> ; coproporphyrinogen III oxidase                    |
| SMa1273              | <i>norB</i> ; nitric oxide reductase, large subunit             |
| SMa1276 <sup>a</sup> | <i>norC</i> ; nitric oxide reductase, small subunit             |
| SMa1279              | <i>norE</i> ; accessory protein for nitric oxide reductase      |
| SMa1283              | <i>nnrU</i> ; NnrU-like transmembrane protein                   |
| SMa1296              | <i>adhA1</i> ; Alcohol dehydrogenase, Zn-dependent class III    |
| SMb21487             | <i>cyoA</i> ; Putative cytochrome o ubiquinol oxidase chain II  |
| SMb21488             | <i>cyoB</i> ; Putative cytochrome o ubiquinol oxidase chain I   |
| SMb21489             | <i>cyoC</i> ; Putative cytochrome o ubiquinol oxidase chain III |
| SMc01169             | <i>ald</i> ; Probable alanine dehydrogenase oxidoreductase      |
| <u>SMc03252</u>      | <i>proB2</i> ; Putative glutamate 5-kinase                      |
| <u>SMc03253</u>      | L-proline cis-4-hydroxylase                                     |

**B.**

**Genes regulated by FixJ and not Adr**

|                      |                                                          |
|----------------------|----------------------------------------------------------|
| SMa0128              | hypothetical protein                                     |
| SMa0130              | fatty acid desaturase                                    |
| SMa0132              | hypothetical protein                                     |
| SMa0625              | hypothetical protein                                     |
| SMa0657              | cytochrome c binding protein, amino terminus             |
| SMa1198              | copper binding protein                                   |
| SMa1232 <sup>b</sup> | <i>napC</i> ; membrane bound nitrate reductase subunit   |
| SMa1233 <sup>b</sup> | <i>napB</i> ; periplasmic nitrate reductase              |
| SMa1239 <sup>b</sup> | <i>napD</i> ; component of periplasmic nitrate reductase |
| SMa1288              | carboxy-lyase                                            |
| SMb20139             | conserved hypothetical transmembrane protein             |
| SMb20433             | <i>eutC</i> ; probable ornithine cyclo-deaminase         |
| SMb20654             | hypothetical protein                                     |
| SMb20704             | <i>glgA2</i> ; putative glycogen synthase                |
| SMb20934             | <i>exsF</i> ; putative two component response regulator  |
| SMb21490             | putative SUR1-like protein                               |
| SMc00063             | conserved hypothetical protein                           |
| SMc00739             | conserved hypothetical protein                           |
| SMc00784             | <i>fbpA</i> ; iron transport protein                     |
| <u>SMc03254</u>      | <i>fixT3</i> ; putative antikinase                       |

857 Highlighted genes are directly involved in the low oxygen or denitrification pathways.

858 Underlined genes are the FixJ direct targets found by Bobik, et al. (*nifA* not shown as it was not

859 seen in the FixJ microarray data) (17). <sup>a</sup>Gene expression verified by qRT-PCR in this  
860 study.<sup>b</sup>Indicates genes that were confirmed by qRT-PCR to be regulated by Adr but did not  
861 appear in the Adr microarray. It should be noted that the FixJ microarray was carried out under  
862 different conditions than those used for the Adr microarray (17). For the complete Adr  
863 microarray, see Supplemental Table S1.

864  
865

**Table 5. Relative transcript levels of *adr* over time, represented as Ct value\***

| <b>Strain</b> | <b>Lag<br/>(OD<sub>600</sub> 0.2)</b> | <b>Mid-exponential<br/>(OD<sub>600</sub> 0.8)</b> | <b>Early Stationary<br/>(OD<sub>600</sub> 1.2)</b> |
|---------------|---------------------------------------|---------------------------------------------------|----------------------------------------------------|
| <b>Rm8530</b> | 34.74 ± 0.48                          | 33.34 ± 0.46                                      | 34.64 ± 0.34                                       |

866 \*Ct value represents the arbitrary cycle where PCR product is detected. Values closer to 40

867 indicate lower amounts of starting transcript.

868 **Table 6. Specific activity of nitrite reductase estimated by methyl-viologen reduction.**

869

| <b>Strain</b>            | <b>Nitrite reductase activity</b>               | <b>Nitrite reductase activity</b>               |
|--------------------------|-------------------------------------------------|-------------------------------------------------|
|                          | <b>Aerobic</b>                                  | <b>Microaerobic</b>                             |
|                          | $\mu\text{mol}/\text{min}/\text{mg}$ of protein | $\mu\text{mol}/\text{min}/\text{mg}$ of protein |
| <b>Rm8530</b>            | $0.372 \pm 0.031$                               | $0.935 \pm 0.076$                               |
| <b>Rm8530 <i>adr</i></b> | $0.042 \pm 0.004$                               | $0.442 \pm 0.049$                               |



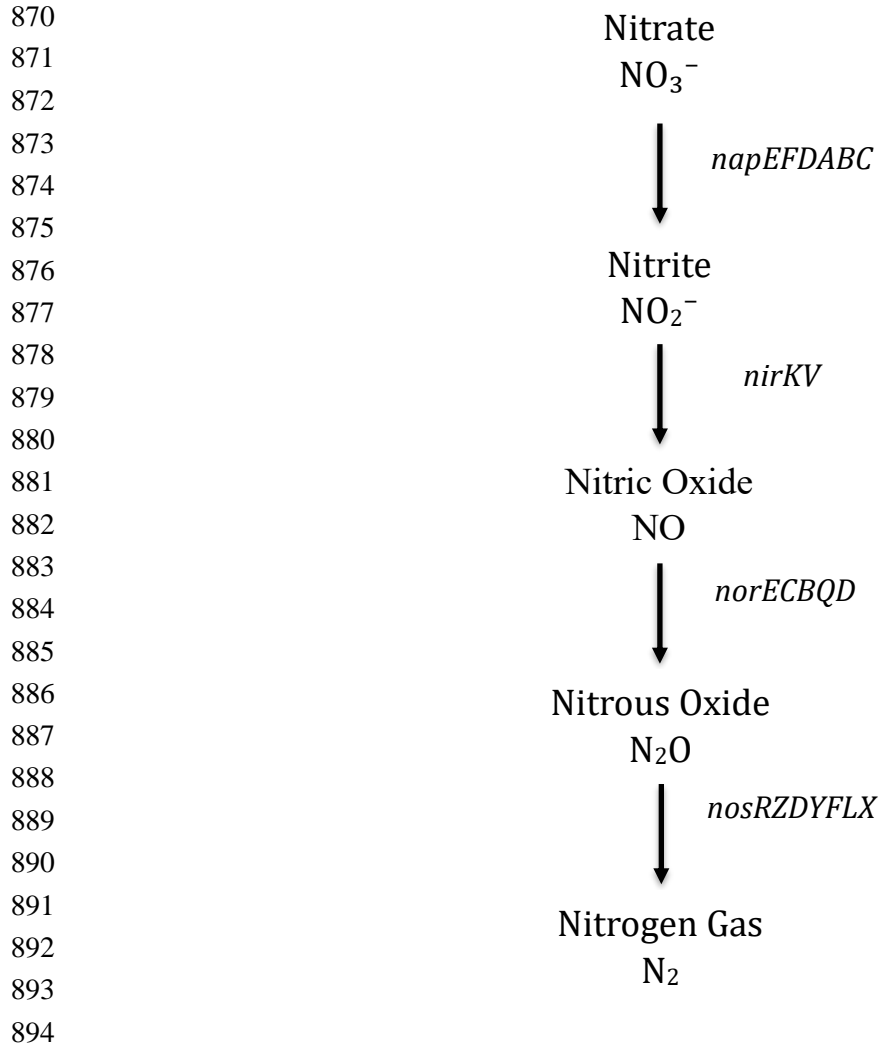

895 **Figure 1. The denitrification pathway in *S. meliloti* and its associated genes.**

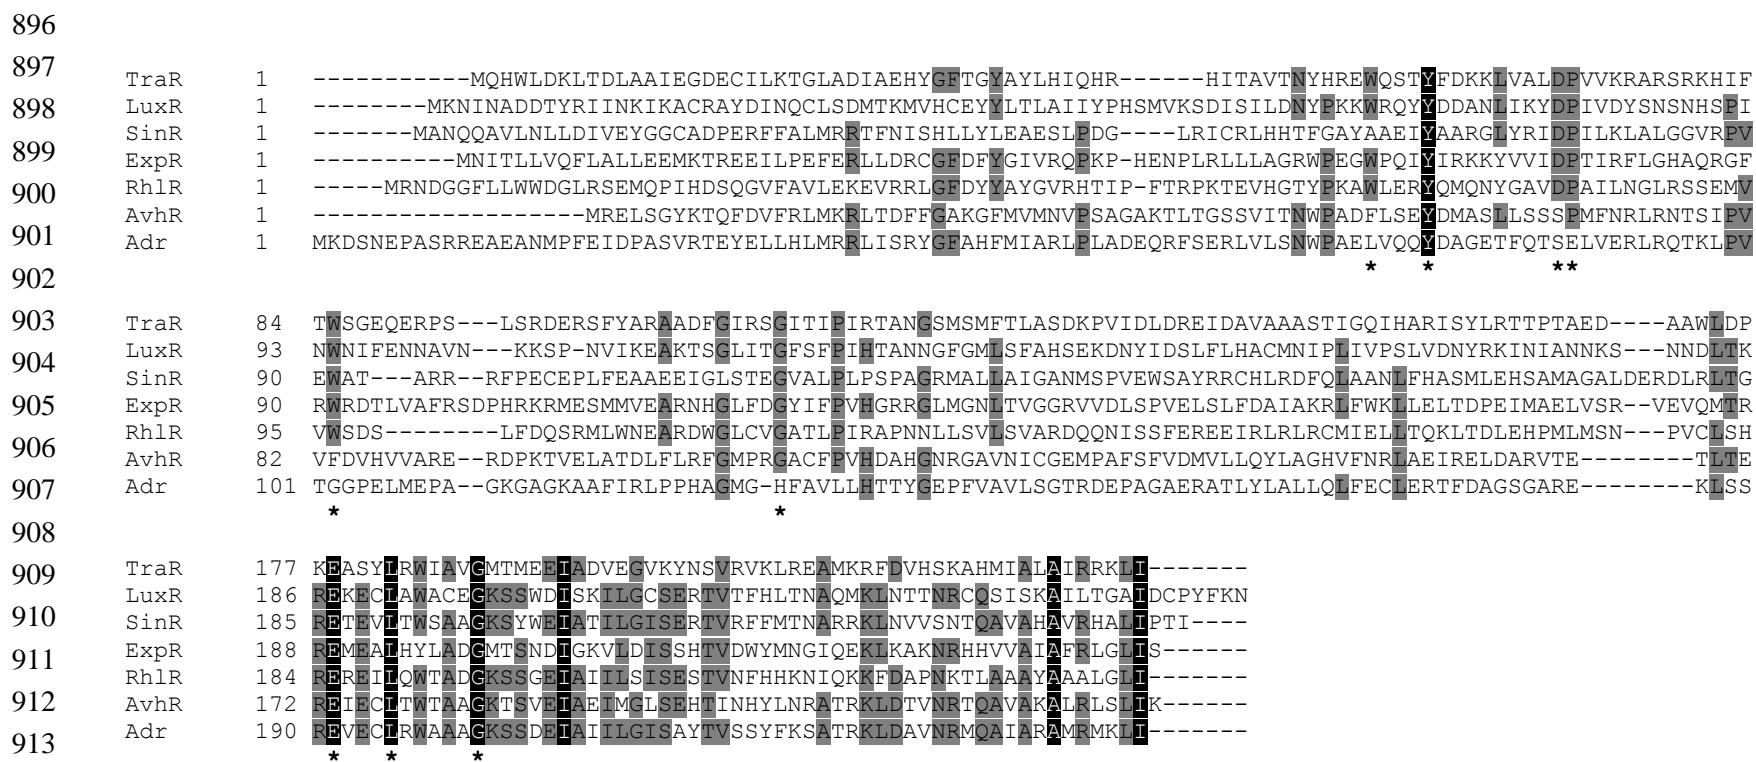

916 **Figure 2. Comparison of Adr (SMc00658) to LuxR.** Sequence alignment of TraR from *Agrobacterium tumefaciens*, LuxR from  
917 *Alovibrio fischeri*, SinR and ExpR from *S. meliloti*, RhIR from *Pseudomonas aeruginosa*, and AvhR from *Agrobacterium vitis* with  
918 Adr from *S. meliloti*. Grey shaded residues are highly similar between proteins and identical proteins are shaded in black. Asterisks  
919 indicate the nine highly conserved residues found in <95% of LuxR-type proteins. The alignment was performed using Invitrogen's  
920 Vector NTI 11 software.

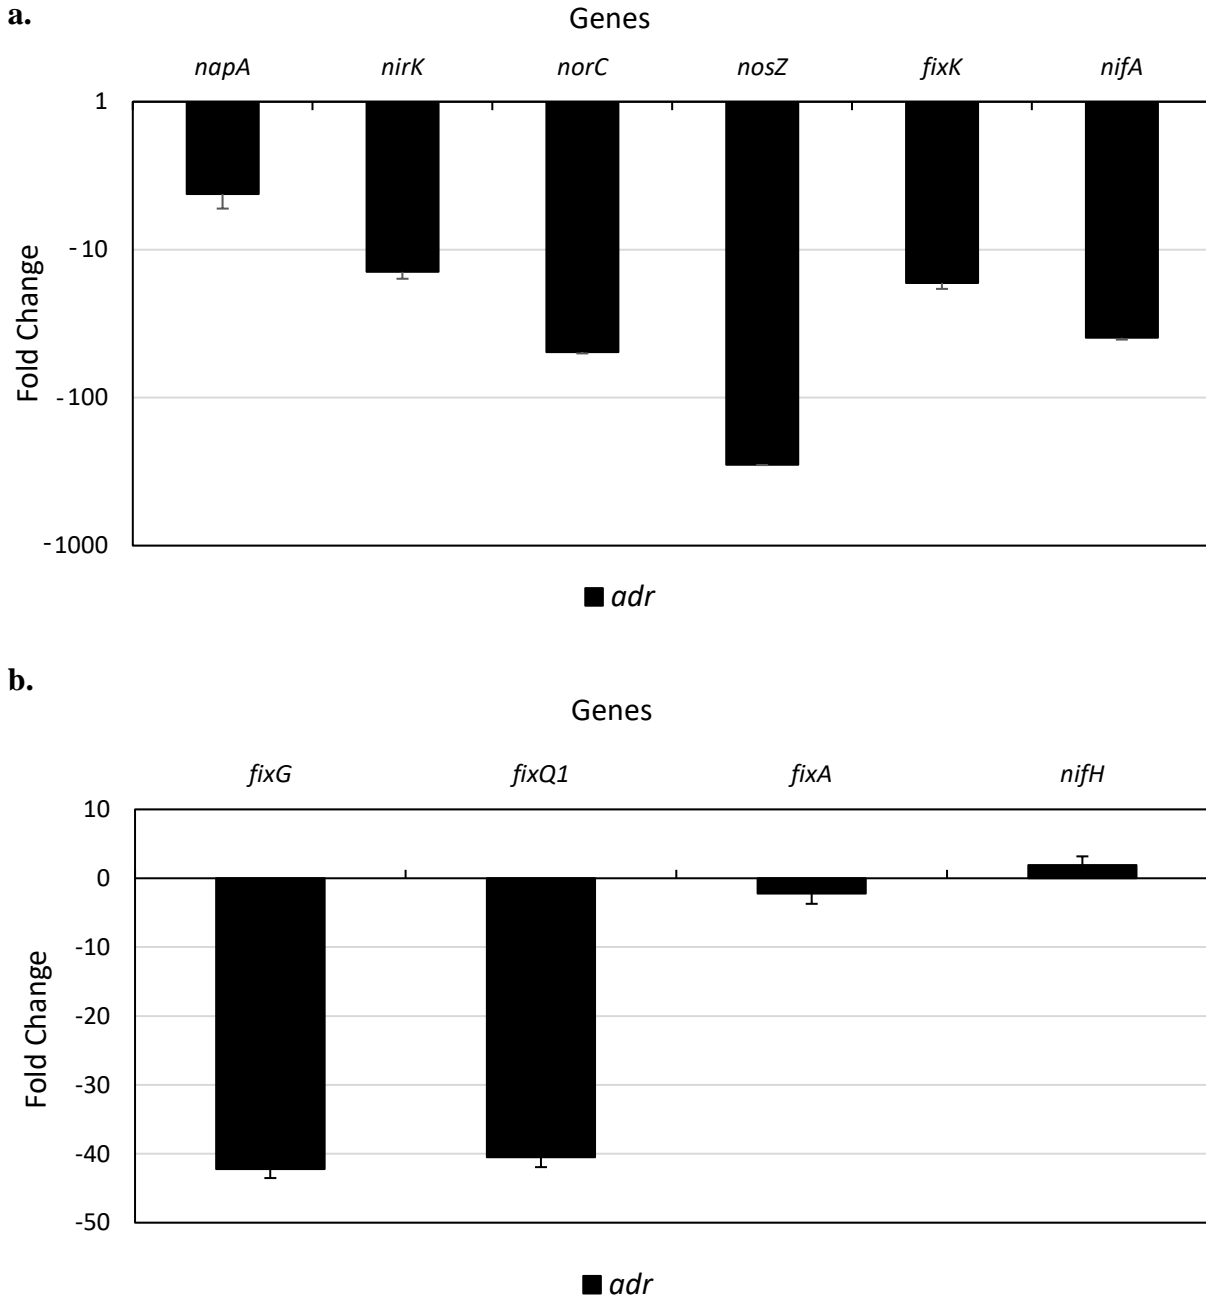

921

922

923 **Figure 3. Relative expression of the *adr* mutant compared to wild-type strain Rm8530.**

924 Expression was measured using qRT-PCR and relative transcript levels are displayed as fold

925 change between the wild-type Rm8530 and the *adr* mutant. Negative values indicate

926 downregulation of the denoted gene in the mutant strain in comparison to the wild-type, while

927 positive values represent the inverse. Results are the average of three independent biological

928 replicates, error bars are present and represent the standard deviation between three samples.

929 *SMc00128* was used as an internal control (52).

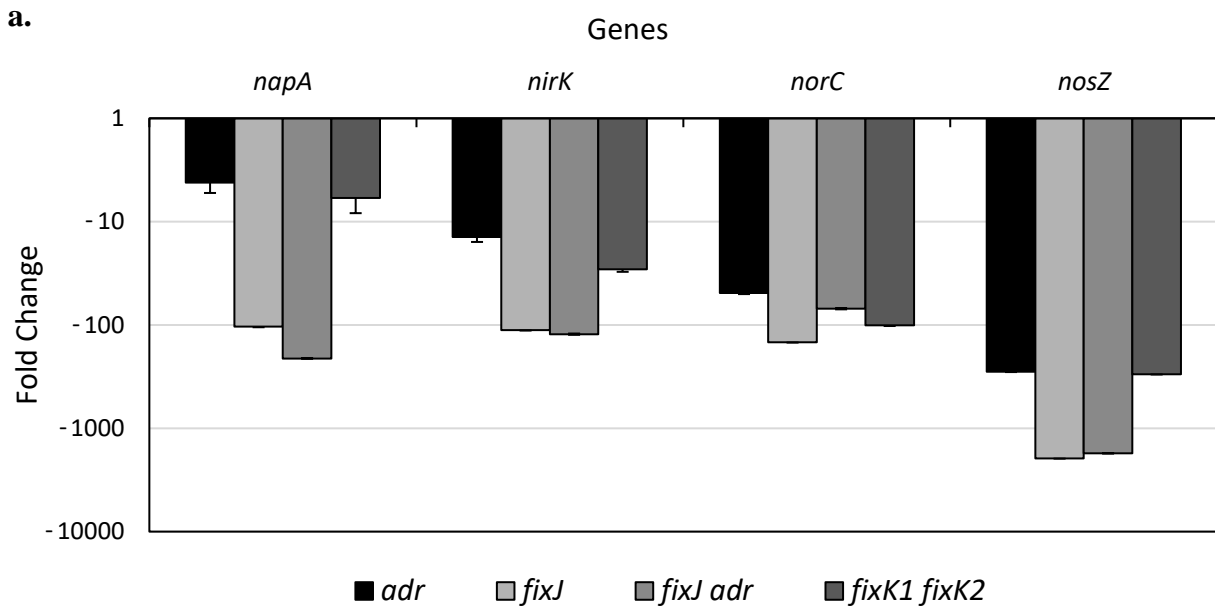

930

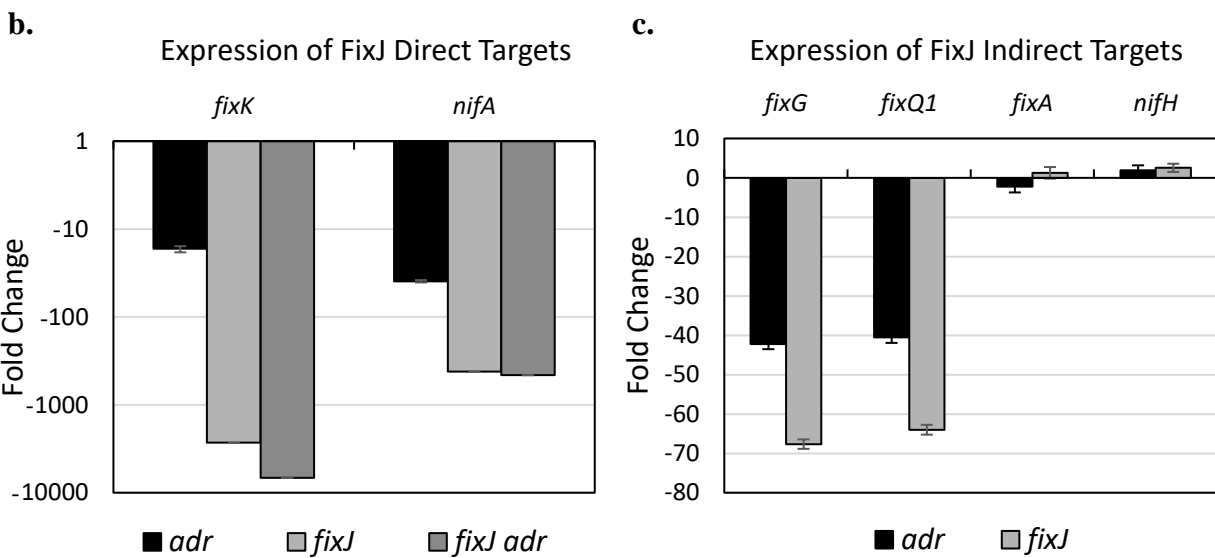

931

932

933

934

935

936

937

**Figure 4. Aerobic expression of denitrification and other FixJ regulated genes.** **a)** The expression of denitrification genes from four mutant strains (*adr*, *fixJ*, *fixJ adr*, and *fixK1 fixK2*) compared to wild-type Rm8530 expression levels. **b)** Direct targets of FixJ, *fixK* (total expression of both genes) and *nifA*. **c)** Comparison of expression between four indirect FixJ targets. *adr* mutant data is the same as that seen in Figure 3, repeated for clarity. Results are the

938 average of three independent biological replicates. Error bars are present and represent standard  
939 deviation. *SMc00128* was used as an internal control (52).

940

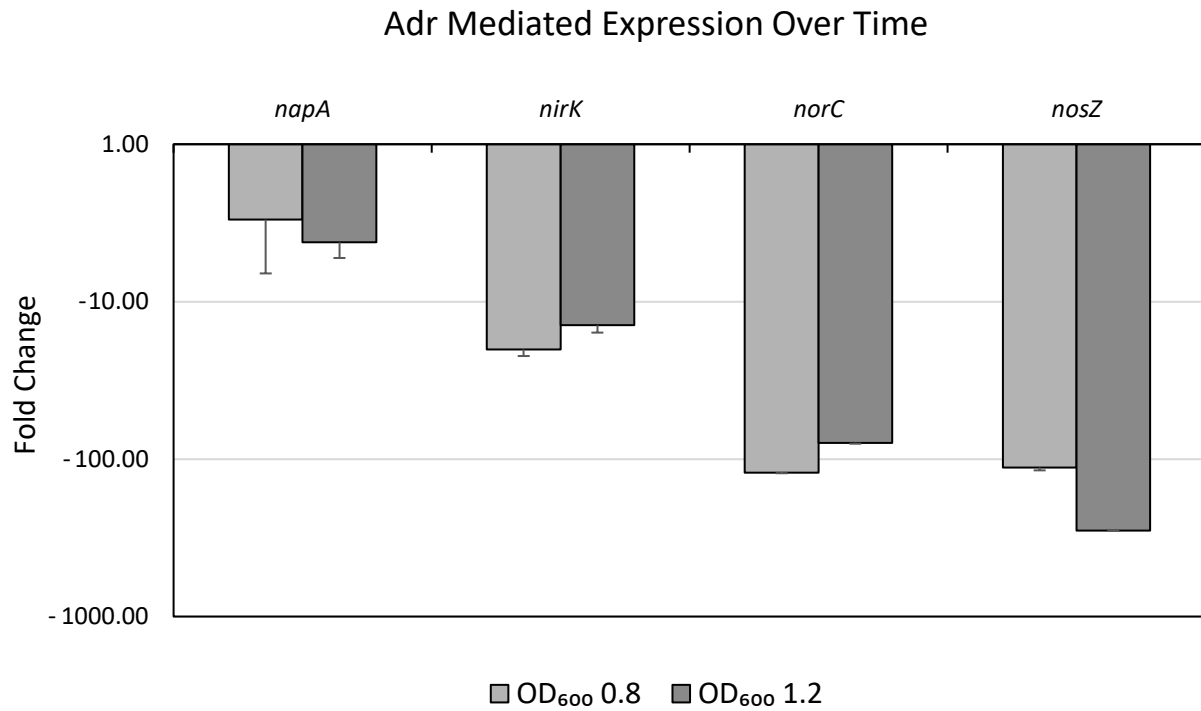

941

942

943 **Figure 5. Expression of denitrification genes in an *adr* mutant over time.** Cells were grown

944 to the indicated optical densities (measured at 600 nm). Expression was measured in three

945 independent biological replicates per density and all are compared to the wild-type expression

946 value. Error bars represent standard deviation. No difference in expression was observed at

947 OD<sub>600</sub> 0.2. *SMc00128* was used as an internal control to normalize values (52).

948

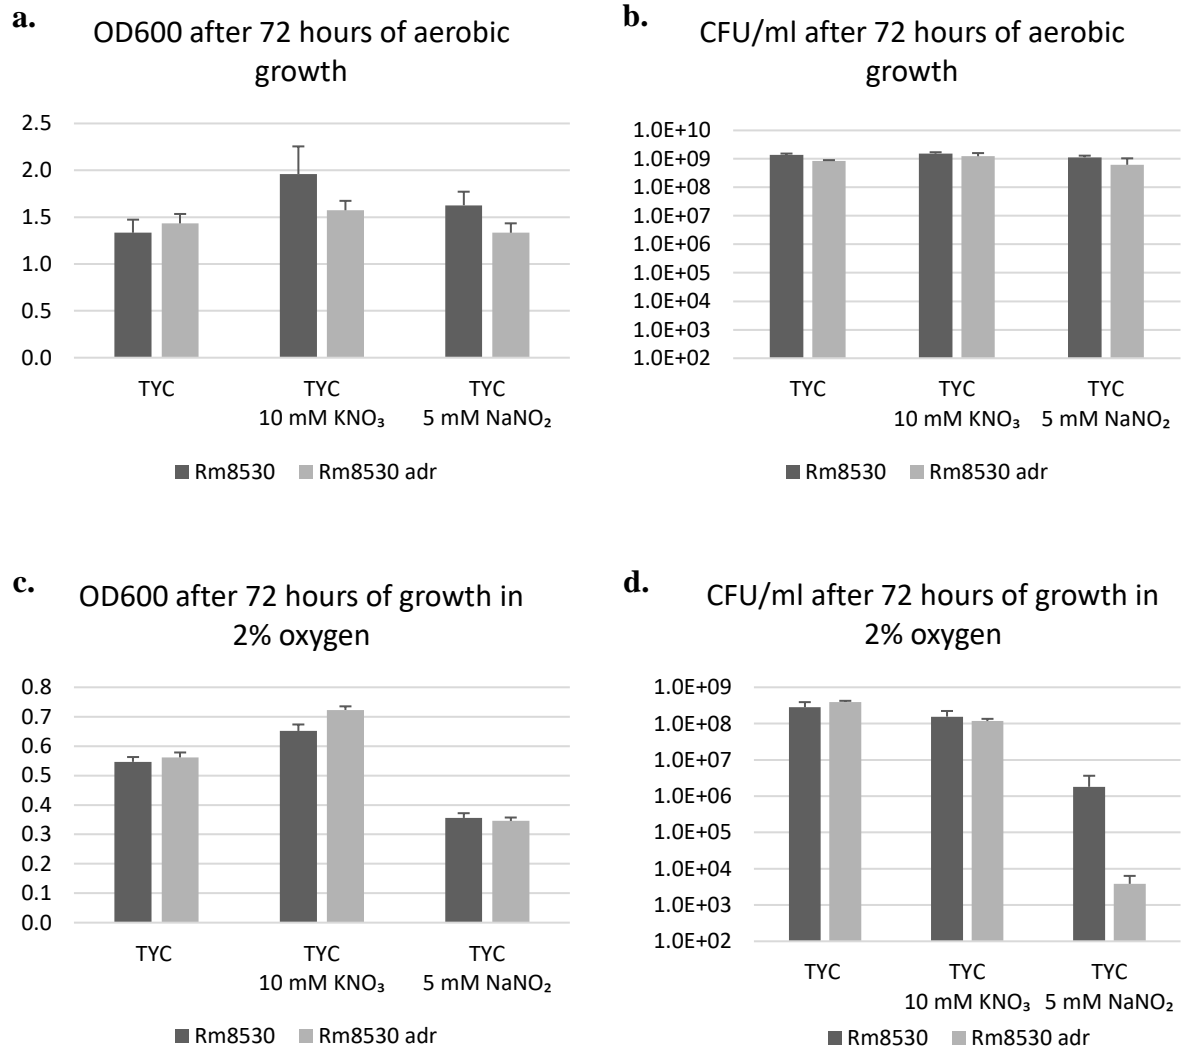

949  
950

951  
952

953 **Figure 6. Growth and survival of the *Adr* mutant.** Growth measurements of wild type

954 Rm8530 and the mutant Rm8530 *adr* were conducted in triplicate under aerobic and

955 microaerobic conditions as described previously



956 **a.**

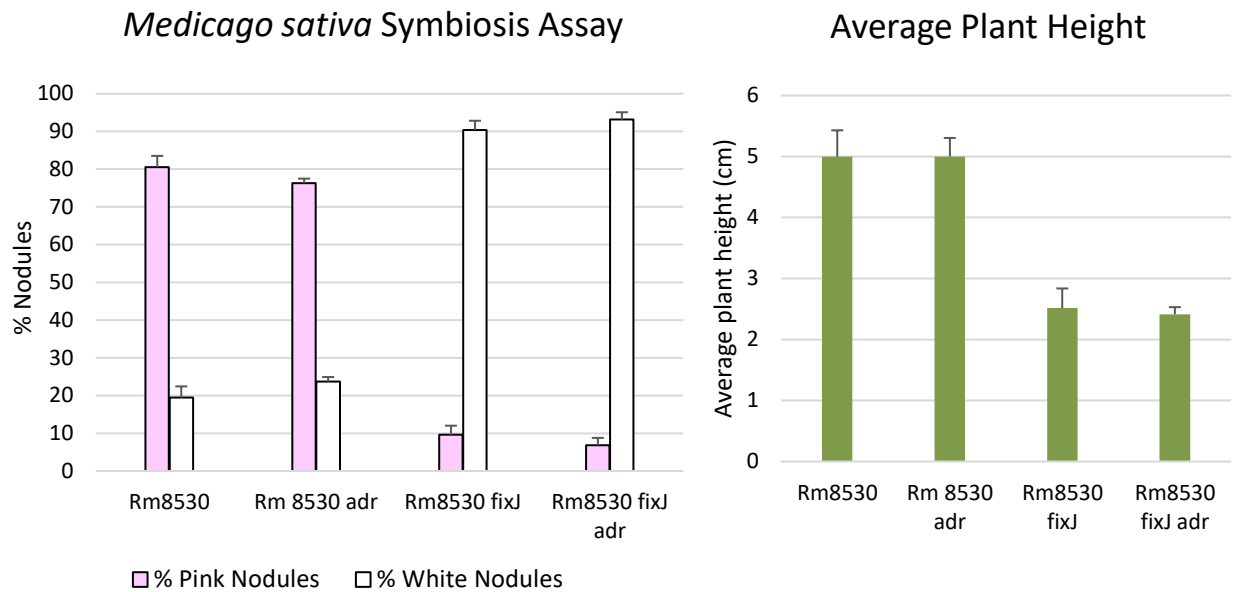

957

**b.**

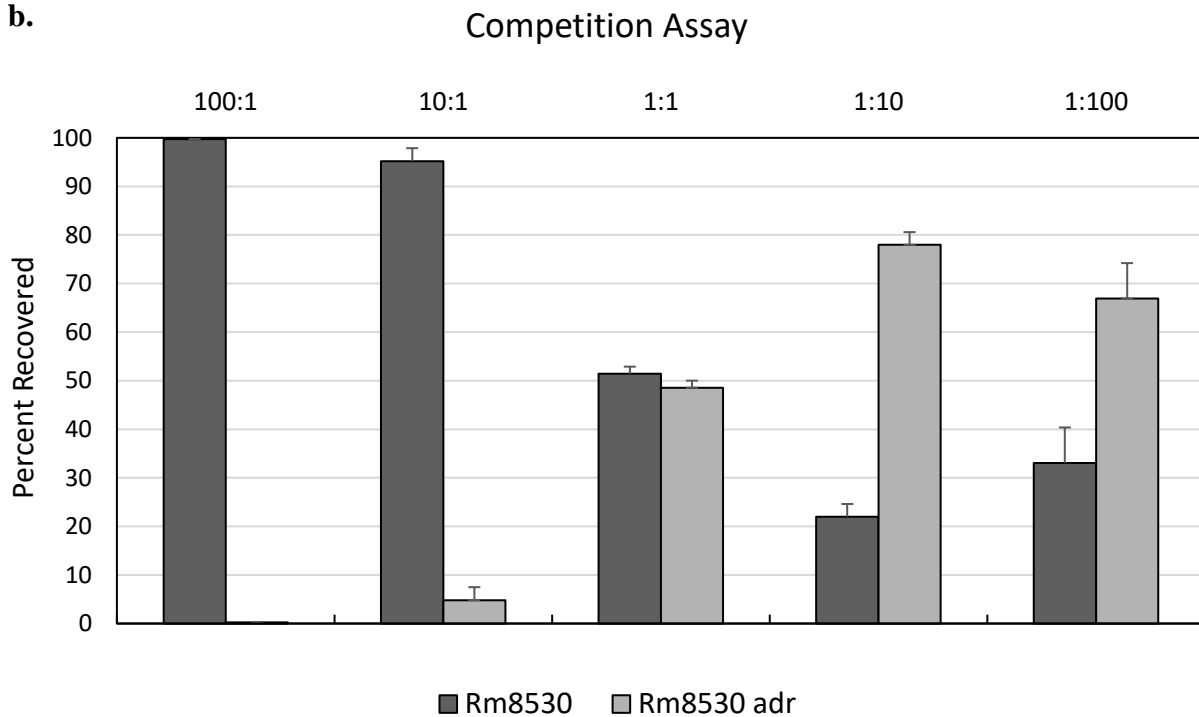

958

959 **Figure 7. Symbiosis and competition assays.** The *adr* mutant was capable of establishing  
960 symbiosis at levels comparable to the wild-type Rm8530, but was unable to compete with wild-  
961 type for nodule occupancy when both strains were co-inoculated. **a)** *Medicago sativa* cv.

962 Iroquois inoculated with wild-type and the *adr* mutant were proficient at forming nitrogen fixing  
963 nodules and the plants were healthy. Strains deficient in *fixJ* were unable to establish nitrogen  
964 fixing nodules and resulted in plants that were not as healthy as the wild-type and *adr* mutant  
965 plants. The results are the average of three independent experiments and the standard deviations  
966 are shown. **b)** Plants were co-inoculated with varying proportions of Rm8530 and the *adr*  
967 mutant, represented on the X-axis. The percentage of bacteria recovered is shown on the Y-axis.  
968

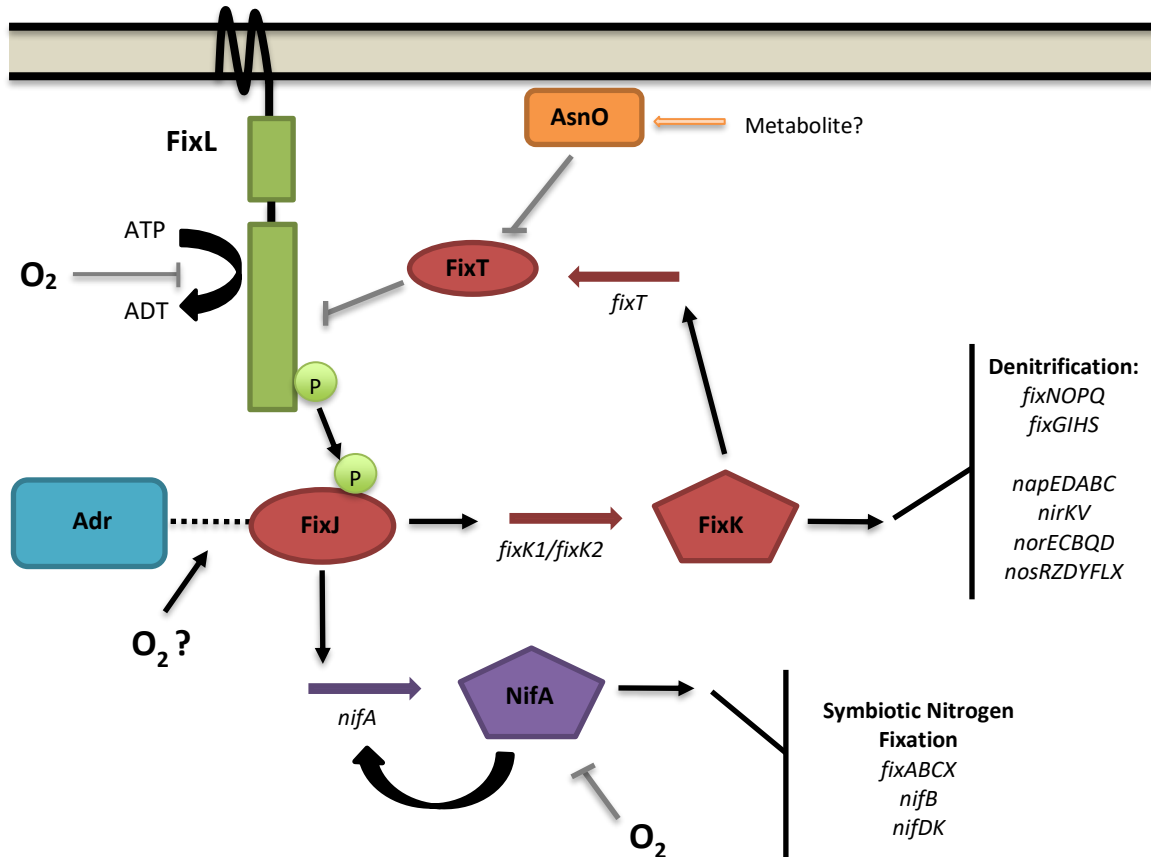

969

970 **Figure 8. Model for regulation of denitrification and nitrogen fixation *S. meliloti*.** Revised  
 971 comprehensive model for the regulation of denitrification and nitrogen fixation in the presence  
 972 and absence of oxygen. Grey lines indicate an inhibitory effect while black arrows indicate a  
 973 positive effect. In the presence of oxygen, the autophosphorylation of FixL is inhibited, leading  
 974 to a low level of phosphorylated FixJ in the cell. Adr interacts with FixJ (dotted line) and  
 975 promotes the expression of the denitrification regulator FixK and the nitrogen fixation regulator  
 976 NifA. FixK goes on to induce expression of the denitrification genes, as well as the antikinase  
 977 FixT, which further inhibits the autophosphorylation of FixL. NifA is oxygen sensitive and is  
 978 deactivated, therefore preventing the expression of the symbiotic fixation genes. When the  
 979 oxygen concentration is low, FixL can autophosphorylate and transfer the phosphate group to  
 980 FixJ. In the phosphorylated form, FixJ can activate the expression of the denitrification and

981 nitrogen fixation genes without the help of Adr. AsnO acts to inhibit the antikinase activity of  
982 FixT, allowing this feedback loop to continue until environmental conditions change. Figure  
983 adapted from Terpolilli, et al. (16).
